# Supplementary material for: Faecal immunochemical testing (FIT) in patients with signs or symptoms of suspected colorectal cancer (CRC): a joint guideline from the Association of Coloproctology of Great Britain and Ireland (ACPGBI) and the British Society of Gastroenterology (BSG)
Source: HighWire-hosted journal article supplement (doi:10.1136/gutjnl-2022-327985), 2022-07-12
Supplement: gutjnl-2022-327985supp001_data_supplement.pdf [file gutjnl-2022-327985supp001_data_supplement.pdf]

### Supplement 1: Methodology

- GDG and extended-Delphi Group
- PICOs
- Systematic review flowchart
- GRADE tables

## Guideline development group (GDG)

### ACPGBI

- Michael Davies (Co-chair)
- Muti Abulafi
- Ayan Banarjea
- Michael Machesney
- Bob Steele

### BSG

- Kevin Monahan (Co-chair)
- Ramesh Arasaradnam
- James East

### General Practice

- Brain Nicholson
- Lance Saker

### Clinical Biochemistry

- Sally Benton

### Patient Advocates

- Neil Barker
- Jenny Pipe

### Colorectal Nursing

- Maria Pettman

### Guideline Methodologist

- Jos Kleijnen

### Epidemiology

- Linda Sharp

### Radiology BSGAR

- David Burling
- James Stephenson

### Clinical Fellows

- Nigel D'Souza
- Rachel Carten
- Richard Booth

### Extended Delphi Participants

#### A) Gastroenterology:

- 1) Colin Rees
- 2) Matt Rutter
- 3) Robert Logan
- 4) James Turvill
- 5) Sunil Dolwani (
- 6) Jeff Turner
- 7) Raji Ramaraj
- 8) Stephen McSorley
- 9) Jack Winter
- 10) Colin Noble
- 11) Conor Lahiff
- 12) Jan Leyden
- 13) Glen Doherty
- 14) Ash Bassi
- 15) Craig Mowat

#### B) Colorectal Surgery:

- 1) Dean Harris
- 2) Michael Thornton
- 3) Jared Torkington
- 4) Damian Mckay
- 5) David Humes
- 6) Barry McAree
- 7) Jack Lee
- 8) Ronan Cahill
- 9) Malcolm Dunlop
- 10) Michelle Thornton (SIGN)

#### C) General Practice:

- 1) Thomas Round
- 2) Willie Hamilton
- 3) Heetan Patel
- 4) Jane Armstrong
- 5) Rachel Lee
- 6) Mary Craig
- 7) Gail Allsopp (RCGP)
- 8) Joseph Lee
- 9) Sam Hilton
- 10) Jo Thomson
- 11) Peter Holloway

- 12) Chris Tasker
- 13) Nicola Weaver
- 14) Lyndsey Williams
- 15) Tina George
- 16) Sarah Taylor
- 17) Katherine Elliot
- 18) Ben Noble
- 19) Richard Roope

## D) Radiology:

- 1) TAYLOR, Stuart , BSGAR outgoing president
- 2) TOLAN, Damian
- 3) PLUMB, Andrew
- 4) Britton, Ingrid
- 5) Williams, Stuart

## E) Biochemistry:

- 1) Callum Fraser
- 2) Judith Strachan
- 3) Ian Godber
- 4) Catherine Bailey
- 5) John Geen
- 6) Ruth Ayling

## F) Nursing:

- 1) Harriet Watson
- 2) Dana Knoyle

## G) Patients:

- 1) Stephen Mawson
- 2) Nannette Spain
- 3) Robin Bainton
- 4) Monica Jefford

## H) Charities:

- 1) Lisa Wilde, Bowel Cancer UK
- 2) Jodie Moffat, Cancer Research UK
- 3) Lesley Booth, Bowel Research UK

## PICOs

## PICO 1: Diagnostic utility of FIT in patients with a suspicion of CRC

| Population                                                                                                                                                                                  | Intervention                                                                                                                                                                                                                                                                                                   | Comparisons                                                                                                                                                                                                                                                                                                                   | Outcome                                                                                                                                                                                                                                                                                                                                                                                                                           |
|---------------------------------------------------------------------------------------------------------------------------------------------------------------------------------------------|----------------------------------------------------------------------------------------------------------------------------------------------------------------------------------------------------------------------------------------------------------------------------------------------------------------|-------------------------------------------------------------------------------------------------------------------------------------------------------------------------------------------------------------------------------------------------------------------------------------------------------------------------------|-----------------------------------------------------------------------------------------------------------------------------------------------------------------------------------------------------------------------------------------------------------------------------------------------------------------------------------------------------------------------------------------------------------------------------------|
| Patients with signs or symptoms of suspected CRC (CRC)<br><br>Subgroups:<br>a. Patient factors:<br>i. Age<br>ii. Ethnicity<br>iii. Gender<br>iv. Deprivation<br>v. Geography<br>vi. Smoking | Pathways including FIT testing in <b>primary care</b> to:<br>a. triage patients for referral to secondary care (2WW / urgent / routine / safety netting / none)<br><br>Subgroups:<br>a. FIT Threshold<br>i. Value (ug/g)<br>ii. Single or multiple (e.g. for population subgroup)<br><br>b. FIT Interpretation | Pathways not including FIT testing in <b>primary care</b> .<br><br>Specialist investigation:<br>i. Direct colonoscopy<br>ii. CT Colonography<br>iii. Flexible sigmoidoscopy<br>iv. Colon Capsule<br>v. Composite of specialist investigations<br>vi. Other<br><br>Clinical records follow-up:<br>i. 6 months<br>ii. 12 months | Patient reported outcomes:<br><br>a. <b>Critical</b> for decision making<br>i. Overall survival<br>ii. Disease free survival<br>iii. Progression free survival<br>iv. Morbidity related to tests in those without bowel disease<br>v. Quality of Life<br><br>b. <b>Important</b> for decision making<br>i. Serious adverse effects<br>ii. Time intervals to diagnosis (consultation -> FIT -> referral -> diagnosis -> treatment) |

|                                                                                                                                                                                                                                                                                                                                                                                                    |                                                                                                                                                                                                                                                                                                      |                                                            |                                                                                                                                                                                                                                                                                                                                                                                                                                                               |
|----------------------------------------------------------------------------------------------------------------------------------------------------------------------------------------------------------------------------------------------------------------------------------------------------------------------------------------------------------------------------------------------------|------------------------------------------------------------------------------------------------------------------------------------------------------------------------------------------------------------------------------------------------------------------------------------------------------|------------------------------------------------------------|---------------------------------------------------------------------------------------------------------------------------------------------------------------------------------------------------------------------------------------------------------------------------------------------------------------------------------------------------------------------------------------------------------------------------------------------------------------|
| <p>vii. BMI</p> <p>viii. Anticoagulants/antiplatelets</p> <p>ix. Family history</p> <p>x. Previous whole colon investigation</p> <p>xi. Other</p> <p>b. Specific symptoms/signs:</p> <p>i. PR Bleeding</p> <p>ii. Change in bowel habit</p> <p>i. Overall</p> <p>ii. Constipation</p> <p>iii. Diarrhoea</p> <p>iii. Abdominal mass</p> <p>iv. Abdominal pain</p> <p>v. Unexplained Weight loss</p> | <p>i. alone</p> <p>ii. plus clinical assessment</p> <p>iii. plus simple biomarkers</p> <p>iv. plus safety netting protocol</p> <p>v. incorporated into a prediction model</p> <p>c. FIT laboratory platform:</p> <p>i. Individually (OC-Sensor, HM-JACKarc, FOB Gold, other)</p> <p>ii. Combined</p> | <p>iii. 18 months</p> <p>iv. 24 months</p> <p>v. Other</p> | <p>iii. Complications – e.g, physical functioning / incontinence / stoma</p> <p>iv. Recurrence</p> <p>Surrogate/Intermediate outcomes:</p> <p>a. <b>Critical</b> for decision making</p> <p>i. Diagnostic accuracy</p> <p>ii. Changes in treatment offered</p> <p>iii. Stage at diagnosis (% stage I &amp; II)</p> <p>iv. Route to diagnosis (all categories)</p> <ul style="list-style-type: none"> <li>- 2WW referral</li> <li>- Urgent referral</li> </ul> |
|----------------------------------------------------------------------------------------------------------------------------------------------------------------------------------------------------------------------------------------------------------------------------------------------------------------------------------------------------------------------------------------------------|------------------------------------------------------------------------------------------------------------------------------------------------------------------------------------------------------------------------------------------------------------------------------------------------------|------------------------------------------------------------|---------------------------------------------------------------------------------------------------------------------------------------------------------------------------------------------------------------------------------------------------------------------------------------------------------------------------------------------------------------------------------------------------------------------------------------------------------------|

|                                                                                                                                                                                                                                                                                                                                                                                                                                                                                                                                                                 |                                                                                                                                                                                                                                                                                                                                                                                                                                                                                                                                       |                                                                                                                                                                                                                                                                                                                                                                                                                                                                                                                                          |                                                                                                                                                                                                                                                                                                                                                                                                                                                                                                                                            |
|-----------------------------------------------------------------------------------------------------------------------------------------------------------------------------------------------------------------------------------------------------------------------------------------------------------------------------------------------------------------------------------------------------------------------------------------------------------------------------------------------------------------------------------------------------------------|---------------------------------------------------------------------------------------------------------------------------------------------------------------------------------------------------------------------------------------------------------------------------------------------------------------------------------------------------------------------------------------------------------------------------------------------------------------------------------------------------------------------------------------|------------------------------------------------------------------------------------------------------------------------------------------------------------------------------------------------------------------------------------------------------------------------------------------------------------------------------------------------------------------------------------------------------------------------------------------------------------------------------------------------------------------------------------------|--------------------------------------------------------------------------------------------------------------------------------------------------------------------------------------------------------------------------------------------------------------------------------------------------------------------------------------------------------------------------------------------------------------------------------------------------------------------------------------------------------------------------------------------|
| <ul style="list-style-type: none"> <li>vi. Palpable Rectal mass</li> <li>vii. Anal mass / anal ulceration</li> <li>viii. Other</li> </ul> <p>c. Specific blood abnormalities</p> <ul style="list-style-type: none"> <li>i. IDA</li> <li>ii. Broad anaemia</li> <li>iii. Thrombocytosis</li> <li>iv. Hyper-ferritinaemia</li> <li>v. Other</li> </ul> <p>d. Clinically stratified</p> <ul style="list-style-type: none"> <li>i. Any symptoms/signs of concern</li> <li>ii. High-risk (e.g. NG12 criteria)</li> <li>iii. Low-risk (e.g. DG30 criteria)</li> </ul> | <p>Pathways including FIT testing in <b>secondary care</b> to:</p> <ul style="list-style-type: none"> <li>a. counsel patient on decision/need to investigate</li> <li>b. determine choice of investigation (urgent / convert to routine with GP consent)</li> <li>c. select patients for one-stop investigation (endoscopy with dedicated radiology staging slots)</li> </ul> <p>Subgroups:</p> <ul style="list-style-type: none"> <li>a. FIT Threshold <ul style="list-style-type: none"> <li>i. Value (ug/g)</li> </ul> </li> </ul> | <p>Pathways not including FIT testing in <b>secondary care</b>.</p> <p>Specialist investigation:</p> <ul style="list-style-type: none"> <li>i. Direct colonoscopy</li> <li>ii. CT Colonography</li> <li>iii. Flexible sigmoidoscopy</li> <li>iv. Colon capsule</li> <li>v. Composite of specialist investigations</li> <li>vi. Other</li> </ul> <p>Clinical records follow-up:</p> <ul style="list-style-type: none"> <li>i. 6 months</li> <li>ii. 12 months</li> <li>iii. 18 months</li> <li>iv. 24 months</li> <li>v. Other</li> </ul> | <ul style="list-style-type: none"> <li>- Routine referral</li> <li>- Emergency presentation</li> </ul> <ul style="list-style-type: none"> <li>v. Number needed to (scope / CTC) to detect one cancer</li> <li>vi. Patient acceptability / reassurance</li> </ul> <p>b. <b>Important</b> for decision making</p> <ul style="list-style-type: none"> <li>i. Improved diagnostic pathway elements</li> <li>ii. Length of stay in hospital</li> <li>iii. Clinician acceptability</li> <li>iv. Number of tests performed per patient</li> </ul> |
|-----------------------------------------------------------------------------------------------------------------------------------------------------------------------------------------------------------------------------------------------------------------------------------------------------------------------------------------------------------------------------------------------------------------------------------------------------------------------------------------------------------------------------------------------------------------|---------------------------------------------------------------------------------------------------------------------------------------------------------------------------------------------------------------------------------------------------------------------------------------------------------------------------------------------------------------------------------------------------------------------------------------------------------------------------------------------------------------------------------------|------------------------------------------------------------------------------------------------------------------------------------------------------------------------------------------------------------------------------------------------------------------------------------------------------------------------------------------------------------------------------------------------------------------------------------------------------------------------------------------------------------------------------------------|--------------------------------------------------------------------------------------------------------------------------------------------------------------------------------------------------------------------------------------------------------------------------------------------------------------------------------------------------------------------------------------------------------------------------------------------------------------------------------------------------------------------------------------------|

|  |                                                                                                                                                                                                                                                                                                                                                                                                                                                                                                            |  |  |
|--|------------------------------------------------------------------------------------------------------------------------------------------------------------------------------------------------------------------------------------------------------------------------------------------------------------------------------------------------------------------------------------------------------------------------------------------------------------------------------------------------------------|--|--|
|  | <ul style="list-style-type: none"><li>ii. Single or multiple (e.g. for population subgroup)</li><li>b. FIT Interpretation<ul style="list-style-type: none"><li>i. alone</li><li>ii. plus clinical assessment</li><li>iii. plus simple biomarkers</li><li>vi. plus safety netting protocol</li><li>iv. incorporated into a prediction model</li></ul></li><li>c. FIT laboratory platform:<ul style="list-style-type: none"><li>i. Individually (OC-Sensor, HM-JACKarc, FOB Gold, other)</li></ul></li></ul> |  |  |
|--|------------------------------------------------------------------------------------------------------------------------------------------------------------------------------------------------------------------------------------------------------------------------------------------------------------------------------------------------------------------------------------------------------------------------------------------------------------------------------------------------------------|--|--|



|  |              |  |  |
|--|--------------|--|--|
|  | ii. Combined |  |  |
|--|--------------|--|--|

**PICO 2: What mechanisms may be employed to avoid delayed diagnosis in patients with FIT negative CRC?**

| Population                                                                                                                                                                                                                                                                                        | Intervention                                                                                                                                                                                                                                                                                                           | Comparison                                                                                                        | Outcome                                                                                                                                                                                                                                                                                                                                                                                                                                                                                                                                            |
|---------------------------------------------------------------------------------------------------------------------------------------------------------------------------------------------------------------------------------------------------------------------------------------------------|------------------------------------------------------------------------------------------------------------------------------------------------------------------------------------------------------------------------------------------------------------------------------------------------------------------------|-------------------------------------------------------------------------------------------------------------------|----------------------------------------------------------------------------------------------------------------------------------------------------------------------------------------------------------------------------------------------------------------------------------------------------------------------------------------------------------------------------------------------------------------------------------------------------------------------------------------------------------------------------------------------------|
| Patients with a negative FIT<br>Patients who do not return FIT<br><br>Subgroups:<br>a. Patient factors:<br>i. Age<br>ii. Ethnicity<br>iii. Gender<br>iv. Deprivation<br>v. Geography<br>vi. Previous whole colon investigation<br>b. Ongoing / no ongoing symptoms<br>c. Referred / not referred. | Referral (urgent / routine) in selected subgroups (demographics / symptoms / blood results).<br><br>Repeat FIT testing (frequency and interval)<br><br>Safety netting (as defined by study)<br><br>Clinical assessment<br><br>Use of other simple tests<br>i. Platelets<br>ii. Haemoglobin<br>iii. MCV<br>iv. Ferritin | Watch and wait in primary care<br><br>No safety netting<br><br>Single FIT test<br><br>An alternative intervention | Patient reported outcomes:<br>a. <b>Critical</b> for decision making<br>i. Overall survival<br>ii. Disease free survival<br>iii. Progression free survival<br>iv. Morbidity related to tests in those without bowel disease<br>v. Quality of Life<br>b. <b>Important</b> for decision making<br>i. Serious adverse effects<br>ii. Time to diagnosis (consultation -> FIT -> referral -> diagnosis -> treatment)<br>iii. Complications – e.g, physical functioning / incontinence / stoma<br>iv. Recurrence<br><br>Surrogate/Intermediate Outcomes: |

|  |                                |  |                                                                                                                                                                                                                                                                                                                                                                                                                                                                                                                                                                                                                                                                                                                                                                                                          |
|--|--------------------------------|--|----------------------------------------------------------------------------------------------------------------------------------------------------------------------------------------------------------------------------------------------------------------------------------------------------------------------------------------------------------------------------------------------------------------------------------------------------------------------------------------------------------------------------------------------------------------------------------------------------------------------------------------------------------------------------------------------------------------------------------------------------------------------------------------------------------|
|  | <p>v. CRP</p> <p>vi. Other</p> |  | <p>c. <b>Critical</b> for decision making</p> <ul style="list-style-type: none"> <li>i. Diagnostic accuracy</li> <li>ii. Changes in treatment offered</li> <li>iii. Stage at diagnosis</li> <li>iv. Route to diagnosis (all categories) <ul style="list-style-type: none"> <li>- 2WW referral</li> <li>- Urgent referral</li> <li>- Routine referral</li> <li>- Emergency presentation</li> </ul> </li> <li>v. Number needed to (scope / CTC) to detect one cancer</li> <li>vi. Patient acceptability / reassurance</li> </ul> <p>d. <b>Important</b> for decision making</p> <ul style="list-style-type: none"> <li>i. Improved diagnostic pathway elements</li> <li>ii. Length of stay in hospital</li> <li>iii. Clinician acceptability</li> <li>iv. Number of tests performed per patient</li> </ul> |
|--|--------------------------------|--|----------------------------------------------------------------------------------------------------------------------------------------------------------------------------------------------------------------------------------------------------------------------------------------------------------------------------------------------------------------------------------------------------------------------------------------------------------------------------------------------------------------------------------------------------------------------------------------------------------------------------------------------------------------------------------------------------------------------------------------------------------------------------------------------------------|

**PICO 3: FIT and equality and access to care**

- 1) What is the acceptability of FIT in patients with suspected CRC symptoms and their treating clinicians?
- 2) How can we avoid discriminating against certain populations in this guideline?
- 3) What lessons may be learned from implementation programmes of FIT in symptomatic populations?

May need to develop non-PICO model for this topic

| Population                                                                                                                                                                   | Intervention                                                                                  | Comparison                                                                                                                                                                                          | Outcome                                                                                                                                                                                                                                                                                              |
|------------------------------------------------------------------------------------------------------------------------------------------------------------------------------|-----------------------------------------------------------------------------------------------|-----------------------------------------------------------------------------------------------------------------------------------------------------------------------------------------------------|------------------------------------------------------------------------------------------------------------------------------------------------------------------------------------------------------------------------------------------------------------------------------------------------------|
| Patients with symptoms of suspected CRC<br>o Subgroups:<br>- Patient - Age, ethnicity, gender, language, deprivation<br>- Learning disability<br>- Hearing or sight impaired | FIT testing<br>o Qualitative outcomes<br>o Uptake in subgroup populations<br>o Implementation | Direct –<br>Specialist investigation:<br>i. Direct colonoscopy<br>ii. CT Colonography<br>iii. Flexible sigmoidoscopy<br>iv. Colon Capsule<br>v. Composite of specialist investigations<br>vi. Other | PRO<br>• Critical for decision making<br>i. Overall survival<br>ii. Disease free survival<br>iii. Progression free survival<br>iv. Morbidity (to be decided what is included)<br>v. <b>Quality of Life</b><br>• Important for decision making<br>i. Serious adverse effects<br>ii. Time to diagnosis |

|                                                                                                                                                                           |  |  |                                                                                                                                                                                                                                                                                                                                                                                                                                                                                                                                                                                                                                                                                      |
|---------------------------------------------------------------------------------------------------------------------------------------------------------------------------|--|--|--------------------------------------------------------------------------------------------------------------------------------------------------------------------------------------------------------------------------------------------------------------------------------------------------------------------------------------------------------------------------------------------------------------------------------------------------------------------------------------------------------------------------------------------------------------------------------------------------------------------------------------------------------------------------------------|
| <ul style="list-style-type: none"> <li>- Accessibility other e.g. housebound, travel</li> <li>- Other physical conditons</li> <li>- Symptoms: High vs low-risk</li> </ul> |  |  | <ul style="list-style-type: none"> <li>iii. Physical functioning / incontinence / stoma</li> <li>iv. Recurrence</li> </ul> <p>Unimportant for decision making</p> <ul style="list-style-type: none"> <li>v. Costs, # of colonoscopies</li> <li>vi. Adverse effects including psychological</li> <li>vii. Satisfaction</li> </ul> <p>Intermediates</p> <ul style="list-style-type: none"> <li>• Critical for decision making <ul style="list-style-type: none"> <li>• Diagnostic accuracy</li> <li>• Changes in treatment offered</li> <li>• Stage at diagnosis</li> <li>• Route to diagnosis (all categories)</li> <li>• Number needed to (colono)scope / CTC</li> </ul> </li> </ul> |
|---------------------------------------------------------------------------------------------------------------------------------------------------------------------------|--|--|--------------------------------------------------------------------------------------------------------------------------------------------------------------------------------------------------------------------------------------------------------------------------------------------------------------------------------------------------------------------------------------------------------------------------------------------------------------------------------------------------------------------------------------------------------------------------------------------------------------------------------------------------------------------------------------|

|  |  |  |                                                                                                                                                                                                                                                                                                                                                                                                                                                                                                                                                                     |
|--|--|--|---------------------------------------------------------------------------------------------------------------------------------------------------------------------------------------------------------------------------------------------------------------------------------------------------------------------------------------------------------------------------------------------------------------------------------------------------------------------------------------------------------------------------------------------------------------------|
|  |  |  | <ul style="list-style-type: none"><li>• Patient acceptability (combine with reassurance)</li><li>• Important for decision making</li><li>• Improved diagnostic pathway elements</li><li>• Length of stay in hospital</li><li>• Reassurance / time to reassurance / time to diagnostic resolution</li><li>• Clinician acceptability</li><li>• Number of tests performed</li></ul> <p>Critical:</p> <ul style="list-style-type: none"><li>• CRC diagnostic accuracy</li><li>• Time to diagnosis</li><li>• Earlier diagnosis (stage shift)</li></ul> <p>Important:</p> |
|--|--|--|---------------------------------------------------------------------------------------------------------------------------------------------------------------------------------------------------------------------------------------------------------------------------------------------------------------------------------------------------------------------------------------------------------------------------------------------------------------------------------------------------------------------------------------------------------------------|

|  |  |  |                                                                                                                                                                                                                                                                                                                                                                           |
|--|--|--|---------------------------------------------------------------------------------------------------------------------------------------------------------------------------------------------------------------------------------------------------------------------------------------------------------------------------------------------------------------------------|
|  |  |  | <ul style="list-style-type: none"><li>• Prioritising investigations</li><li>• Morbidity of interventions</li><li>• Reduced CRC Morbidity</li><li>• Develop patient pathway to diagnosis</li></ul> <p>Lower importance</p> <ul style="list-style-type: none"><li>• Predicted resource impact</li><li>• SBD: Polyps – advanced / non-advanced</li><li>• Other SBD</li></ul> |
|  |  |  |                                                                                                                                                                                                                                                                                                                                                                           |

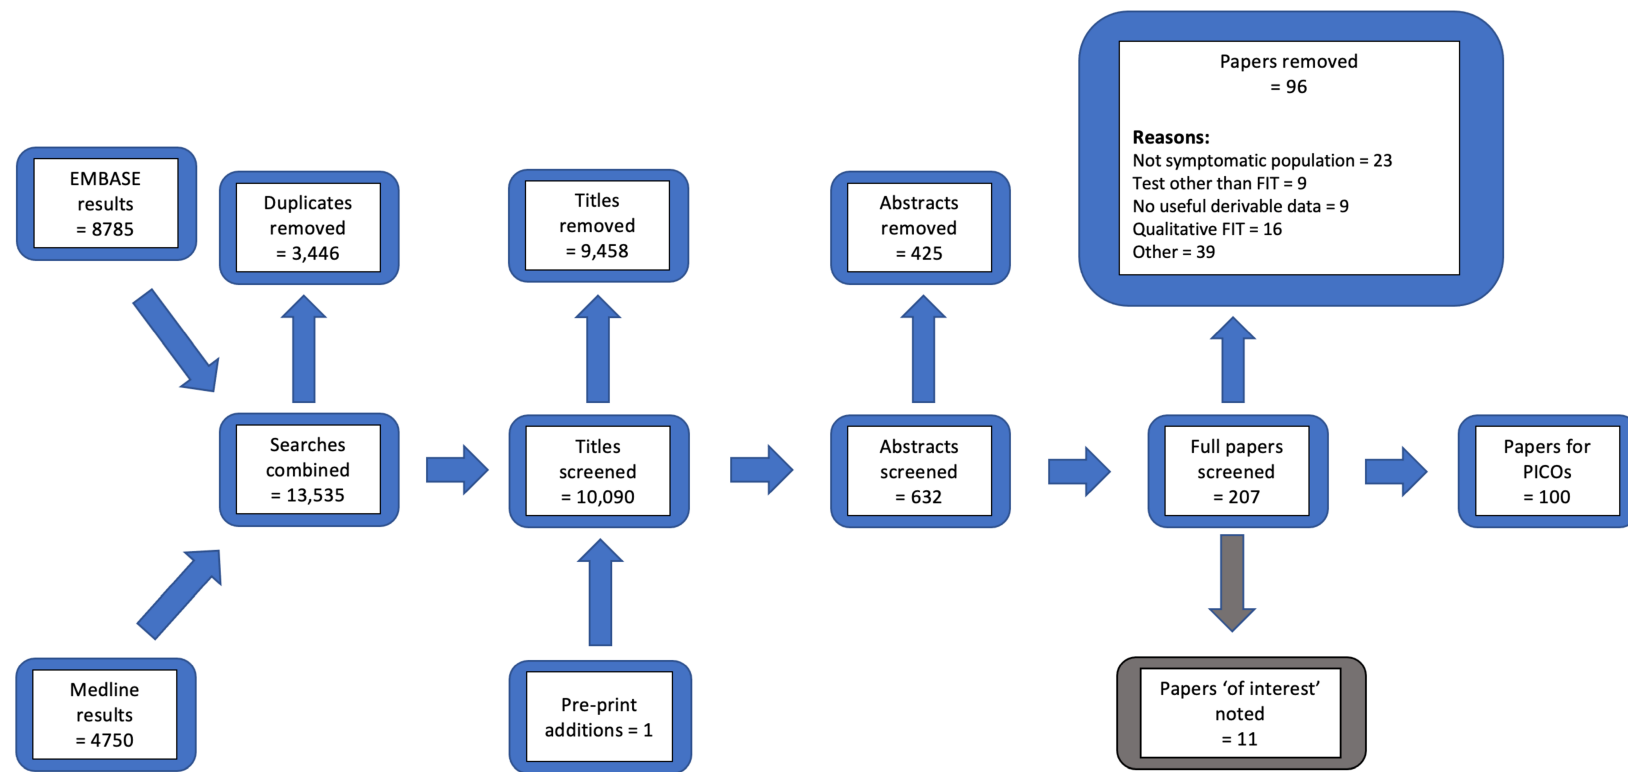

Figure S1: Flowchart of systematic review of evidence



## GRADE Tables

Table 1: Should Faecal immunochemical test be used to diagnose colorectal cancer in patients with all symptoms (NG12, DG30 or NC)?

| Sensitivity                                                     |                                | 0.90 (95% CI: 0.88 to 0.92)                  |                                                 | Prevalences          |                      | 4.2%        | 1.1%             | 13.6%                            |                              |                               |                                                         |
|-----------------------------------------------------------------|--------------------------------|----------------------------------------------|-------------------------------------------------|----------------------|----------------------|-------------|------------------|----------------------------------|------------------------------|-------------------------------|---------------------------------------------------------|
| Specificity                                                     |                                | 0.76 (95% CI: 0.71 to 0.80)                  |                                                 |                      |                      |             |                  |                                  |                              |                               |                                                         |
| Outcome                                                         | No of studies (No of patients) | Study design                                 | Factors that may decrease certainty of evidence |                      |                      |             |                  | Effect per 1,000 patients tested |                              |                               | Test accuracy CoE                                       |
|                                                                 |                                |                                              | Risk of bias                                    | Indirectness         | Inconsistency        | Imprecision | Publication bias | pre-test probability of 4.2%     | pre-test probability of 1.1% | pre-test probability of 13.6% |                                                         |
| <b>True positives</b> (patients with colorectal cancer)         | 15 studies<br>35782 patients   | cross-sectional (cohort type accuracy study) | serious <sup>a</sup>                            | serious <sup>b</sup> | serious <sup>c</sup> | not serious | none             | 38 (37 to 39)                    | 10 (10 to 10)                | 122 (120 to 125)              | ⊕○○○<br>Very low<br>1,2,3,4,5,6,7,8,9,10,11,12,13,14,15 |
| <b>False negatives</b> (patients incorrectly classified as not) |                                |                                              |                                                 |                      |                      |             |                  | 4 (3 to 5)                       | 1 (1 to 1)                   | 14 (11 to 16)                 |                                                         |

| Outcome                                                                              | No of studies (No of patients) | Study design                                 | Factors that may decrease certainty of evidence |                      |                      |             |                  | Effect per 1,000 patients tested |                              |                               | Test accuracy CoE |
|--------------------------------------------------------------------------------------|--------------------------------|----------------------------------------------|-------------------------------------------------|----------------------|----------------------|-------------|------------------|----------------------------------|------------------------------|-------------------------------|-------------------|
|                                                                                      |                                |                                              | Risk of bias                                    | Indirectness         | Inconsistency        | Imprecision | Publication bias | pre-test probability of 4.2%     | pre-test probability of 1.1% | pre-test probability of 13.6% |                   |
| having colorectal cancer)                                                            |                                |                                              |                                                 |                      |                      |             |                  |                                  |                              |                               |                   |
| <b>True negatives</b> (patients without colorectal cancer)                           | 15 studies<br>35782 patients   | cross-sectional (cohort type accuracy study) | serious <sup>a</sup>                            | serious <sup>b</sup> | serious <sup>c</sup> | not serious | none             | 728 (680 to 766)                 | 752 (702 to 791)             | 657 (613 to 691)              | ⊕○○○<br>Very low  |
| <b>False positives</b> (patients incorrectly classified as having colorectal cancer) |                                |                                              |                                                 |                      |                      |             |                  | 230 (192 to 278)                 | 237 (198 to 287)             | 207 (173 to 251)              |                   |

| Outcome           | No of studies (No of patients) | Study design | Factors that may decrease certainty of evidence |              |               |             |                  | Effect per 1,000 patients tested |                              |                               | Test accuracy CoE |
|-------------------|--------------------------------|--------------|-------------------------------------------------|--------------|---------------|-------------|------------------|----------------------------------|------------------------------|-------------------------------|-------------------|
|                   |                                |              | Risk of bias                                    | Indirectness | Inconsistency | Imprecision | Publication bias | pre-test probability of 4.2%     | pre-test probability of 1.1% | pre-test probability of 13.6% |                   |
| Colorectal cancer |                                |              |                                                 |              |               |             |                  |                                  |                              |                               |                   |

**Explanations:**

- Studies were judged at a high risk of bias in patient selection.
- Results based on indirect comparisons from different studies; direct evidence about impact on patient-important outcomes
- Significant heterogeneity detected

**Footnote:** CoE = certainty of evidence

**References**

- Chapman, C, Thomas, C, Morling, J, Tangri, A, Oliver, S, Simpson, J A, Humes, D J, Banerjee, A. Early clinical outcomes of a rapid colorectal cancer diagnosis pathway using faecal immunochemical testing in Nottingham. *Colorectal Disease*; 2020.
- D'Souza, N, Delisle, T G, Chen, M, Benton, S C, Abulafi, M, Committee, Nice Fit Steering. Faecal immunochemical testing in symptomatic patients to prioritize investigation: diagnostic accuracy from NICE FIT Study. *British Journal of Surgery*; 2021.
- D'Souza, N, Hicks, G, Benton, S C, Abulafi, M. The diagnostic accuracy of the faecal immunochemical test for colorectal cancer in risk-stratified symptomatic patients. *Annals of the Royal College of Surgeons of England*; 2020.
- Farrugia, A, Widlak, M, Evans, C, Smith, S C, Arasaradnam, R. Faecal immunochemical testing (FIT) in symptomatic patients: What are we missing?. *Frontline Gastroenterology*; 2020.
- Godber, I M, Todd, L M, Fraser, C G, MacDonald, L R, Younes, H B. Use of a faecal immunochemical test for haemoglobin can aid in the investigation of patients with lower abdominal symptoms. *Clinical Chemistry and Laboratory Medicine*; 2016.
- Herrero, J M, Vega, P, Salve, M, Bujanda, L, Cubiella, J. Symptom or faecal immunochemical test based referral criteria for colorectal cancer detection in symptomatic patients: A diagnostic tests study. *BMC Gastroenterology*; 2018.
- Khasawneh, F, Osborne, T, Stephenson, J, Barnes, D, Seehra, J, Danaher, P, Jones, J, Singh, B. Faecal immunochemical testing is a cost-effective way to stratify symptomatic patients for urgent straight to test investigation. *Colorectal Disease*; 2020.

8. McSorley, S, Witherspoon, P, Rigg, D, Burton, P, Winter, J. A colorectal referral pathway incorporating primary care faecal haemoglobin testing safely and effectively prioritises investigation. *Gut*; 2021.
9. Mowat, C, Digby, J, Strachan, J A, Wilson, R, Carey, F A, Fraser, C G, Steele, R J C. Faecal haemoglobin and faecal calprotectin as indicators of bowel disease in patients presenting to primary care with bowel symptoms. *Gut*; 2016.
10. Laszlo, Helga E., Seward, Edward, Ayling, Ruth M., Lake, Jennifer, Malhi, Aman, Stephens, Clare, Pritchard-Jones, Kathy, Chung, Donna, Hackshaw, Allan, Machesney, Michael. Faecal immunochemical test for patients with 'high-risk' bowel symptoms: a large prospective cohort study and updated literature review. *British Journal of Cancer*; 2021/12/13.
11. Morales Arraez, D E, Hernandez, G, Carrillo, M, Adrian, Z, Gimeno, A Z, Quintero, E. Role of faecal immunochemical testing in the diagnostic workup of patients with iron deficiency anaemia. *United European Gastroenterology Journal*; 2018.
12. Turvill, J. L., Turnock, D., Cottingham, D., Haritakis, M., Jeffery, L., Girdwood, A., Hearfield, T., Mitchell, A., Keding, A.. The Fast Track FIT study: Diagnostic accuracy of faecal immunochemical test for haemoglobin in patients with suspected colorectal cancer. *British Journal of General Practice*; 2021.
13. Rodriguez-Alonso, L., Rodriguez-Moranta, F., Ruiz-Cerulla, A., Lobaton, T., Arajol, C., Binefa, G., Moreno, V., Guardiola, J.. An urgent referral strategy for symptomatic patients with suspected colorectal cancer based on a quantitative immunochemical faecal occult blood test. *Dig Liver Dis*; Sep 2015.
14. Navarro, M, Hijos, G, Sostres, C, Lue, A, Puente-Lanzarote, J J, Carrera-Lasfuentes, P, Lanás, A. Reducing the Cut-Off Value of the Faecal Immunochemical Test for Symptomatic Patients Does Not Improve Diagnostic Performance. *Frontiers in Medicine*; 2020.
15. Tsapournas, G, Hellstrom, P M, Cao, Y, Olsson, L I. Diagnostic accuracy of a quantitative faecal immunochemical test vs. symptoms suspected for colorectal cancer in patients referred for colonoscopy. *Scandinavian Journal of Gastroenterology*; 2020.

**Table 2: Flexible sigmoidoscopy compared to FIT (if negative) for referral of patients with persistent / recurrent rectal bleeding**

**Setting:** Secondary care

| Certainty assessment |              |              |               |              |             |                      | Impact | Certainty | Importance |
|----------------------|--------------|--------------|---------------|--------------|-------------|----------------------|--------|-----------|------------|
| No of studies        | Study design | Risk of bias | Inconsistency | Indirectness | Imprecision | Other considerations |        |           |            |

**Under-detection of CRC (assessed with: FIT)**

| Certainty assessment |                       |                      |               |                      |                      |                                                                                            | Impact                                                                                                                                                                                                                                                                       | Certainty                     | Importance |
|----------------------|-----------------------|----------------------|---------------|----------------------|----------------------|--------------------------------------------------------------------------------------------|------------------------------------------------------------------------------------------------------------------------------------------------------------------------------------------------------------------------------------------------------------------------------|-------------------------------|------------|
| No of studies        | Study design          | Risk of bias         | Inconsistency | Indirectness         | Imprecision          | Other considerations                                                                       |                                                                                                                                                                                                                                                                              |                               |            |
| 1                    | observational studies | serious <sup>a</sup> | not serious   | serious <sup>b</sup> | serious <sup>c</sup> | strong association all plausible residual confounding would reduce the demonstrated effect | We recommend referral of patients with persistent / recurrent rectal bleeding for flexible sigmoidoscopy if FIT is negative. In patients with rectal bleeding and undetectable f-Hb the use of flexible sigmoidoscopy can reduce the probability of undetected CRC to 0.03%. | ⊕○○○<br>Very low <sup>1</sup> | CRITICAL   |

**CI:** confidence interval

#### Explanations

- a. D'Souza was judged at a high risk of bias in patient selection.
- b. Direct evidence about impact on patient-important outcomes was missing
- c. Wide confidence intervals for sensitivity in NRB for >10

#### References

1. Hicks, G, D'Souza, N, Georgiou Delisle, T, Chen, M, Benton, S C, Abulafi, M. Using the faecal immunochemical test in patients with rectal bleeding: evidence from the NICE FIT study. *Colorectal Disease*; 2021.

2.D'Souza, N., Monahan, K., Benton, S. C., Wilde, L., Abulafi, M., Group, Nice Fit Steering. Finding the needle in the haystack: the diagnostic accuracy of the faecal immunochemical test for colorectal cancer in younger symptomatic patients. *Colorectal Disease*; 2021.

**Table 3: Should FIT threshold of  $\geq 10\mu\text{g}$  vs. be used to diagnose in referral for CRC investigation?**

| Sensitivity                                                             |                                | 0.91 (95% CI: 0.85 to 0.94)                  |                                                 | Prevalences          | 1.1%                 | 0.8%        | 1.8%             |                                  |                              |                              |                                          |
|-------------------------------------------------------------------------|--------------------------------|----------------------------------------------|-------------------------------------------------|----------------------|----------------------|-------------|------------------|----------------------------------|------------------------------|------------------------------|------------------------------------------|
| Specificity                                                             |                                | 0.71 (95% CI: 0.57 to 0.82)                  |                                                 |                      |                      |             |                  | pre-test probability of 1.1%     | pre-test probability of 0.8% | pre-test probability of 1.8% | Test accuracy CoE                        |
| Outcome                                                                 | No of studies (No of patients) | Study design                                 | Factors that may decrease certainty of evidence |                      |                      |             |                  | Effect per 1,000 patients tested |                              |                              | Test accuracy CoE                        |
|                                                                         |                                |                                              | Risk of bias                                    | Indirectness         | Inconsistency        | Imprecision | Publication bias | pre-test probability of 1.1%     | pre-test probability of 0.8% | pre-test probability of 1.8% |                                          |
| <b>True positives</b> (patients with )                                  | 4 studies (12141 patients)     | cross-sectional (cohort type accuracy study) | serious <sup>a</sup>                            | serious <sup>b</sup> | serious <sup>c</sup> | not serious | none             | 10 (9 to 10)                     | 7 (7 to 8)                   | 16 (15 to 17)                | ⊕○○○<br>○<br>Very low <sup>1,2,3,4</sup> |
| <b>False negatives</b> (patients incorrectly classified as not having ) |                                |                                              |                                                 |                      |                      |             |                  | 1 (1 to 2)                       | 1 (0 to 1)                   | 2 (1 to 3)                   |                                          |
| <b>True negatives</b> (patients without )                               | 4 studies (12141 patients)     | cross-sectional (cohort type)                | serious <sup>a</sup>                            | serious <sup>b</sup> | serious <sup>c</sup> | not serious | none             | 702 (564 to 811)                 | 704 (565 to 813)             | 697 (560 to 805)             | ⊕○○○<br>○<br>Very low                    |

| Outcome                                                             | No of studies (No of patients) | Study design    | Factors that may decrease certainty of evidence |              |               |             |                  | Effect per 1,000 patients tested |                              |                              | Test accuracy CoE |
|---------------------------------------------------------------------|--------------------------------|-----------------|-------------------------------------------------|--------------|---------------|-------------|------------------|----------------------------------|------------------------------|------------------------------|-------------------|
|                                                                     |                                |                 | Risk of bias                                    | Indirectness | Inconsistency | Imprecision | Publication bias | pre-test probability of 1.1%     | pre-test probability of 0.8% | pre-test probability of 1.8% |                   |
| <b>False positives</b> (patients incorrectly classified as having ) |                                | accuracy study) |                                                 |              |               |             |                  | 287 (178 to 425)                 | 288 (179 to 427)             | 285 (177 to 422)             |                   |

#### Explanations

- Studies were judged at a high risk of bias in patient selection.
- Results based on indirect comparisons from different studies; direct evidence about impact on patient-important outcomes
- Significant heterogeneity detected

**Footnote:** CoE = certainty of evidence

#### References

- Chapman, C, Bunce, J, Oliver, S, Ng, O, Tangri, A, Rogers, R, Logan, R F, Humes, D J, Banerjee, A. Service evaluation of faecal immunochemical testing and anaemia for risk stratification in the 2-week-wait pathway for colorectal cancer. *BJS Open*; 2019.
- Khasawneh, F, Osborne, T, Stephenson, J, Barnes, D, Seehra, J, Danaher, P, Jones, J, Singh, B. Faecal immunochemical testing is a cost-effective way to stratify symptomatic patients for urgent straight to test investigation. *Colorectal Disease*; 2020.
- McSorley, S T, Digby, J, Clyde, D, Cruickshank, N, Burton, P, Barker, L, Strachan, J A, Fraser, C G, Smith, K, Mowat, C, Winter, J, Steele, R J C. Yield of colorectal cancer at colonoscopy according to faecal haemoglobin concentration in symptomatic patients referred from primary care. *Colorectal Disease*; 2021.
- Mowat, C, Digby, J, Strachan, J A, Wilson, R, Carey, F A, Fraser, C G, Steele, R J C. Faecal haemoglobin and faecal calprotectin as indicators of bowel disease in patients presenting to primary care with bowel symptoms. *Gut*; 2016.

**Table 4: Should OC-sensor vs. HM JACK-arc be used to diagnose CRC in patients with all symptoms (NG12, DG30 or NC)?**

| OC-sensor                                 |                                | HM JACK-arc                            |                                                 | Prevalences          |                      |             |                  |                                  |                                |                                |                                |                               |                  |                                                      |  |
|-------------------------------------------|--------------------------------|----------------------------------------|-------------------------------------------------|----------------------|----------------------|-------------|------------------|----------------------------------|--------------------------------|--------------------------------|--------------------------------|-------------------------------|------------------|------------------------------------------------------|--|
| Sensitivity                               | 0.90 (95% CI: 0.86 to 0.93)    | Sensitivity                            | 0.90 (95% CI: 0.87 to 0.92)                     | 4.2%                 | 1.1%                 | 13.6%       |                  |                                  |                                |                                |                                |                               |                  |                                                      |  |
| Specificity                               | 0.74 (95% CI: 0.68 to 0.79)    | Specificity                            | 0.78 (95% CI: 0.69 to 0.85)                     |                      |                      |             |                  |                                  |                                |                                |                                |                               |                  |                                                      |  |
| Outcome                                   | No of studies (No of patients) | Study design                           | Factors that may decrease certainty of evidence |                      |                      |             |                  | Effect per 1,000 patients tested |                                |                                |                                |                               |                  | Test accuracy CoE                                    |  |
|                                           |                                |                                        | Risk of bias                                    | Indirectness         | Inconsistency        | Imprecision | Publication bias | pre-test probability of 4.2%     |                                | pre-test probability of 1.1%   |                                | pre-test probability of 13.6% |                  |                                                      |  |
|                                           |                                |                                        |                                                 |                      |                      |             |                  |                                  |                                |                                |                                |                               |                  |                                                      |  |
| <b>True positives</b> (patients with CRC) | 13 studies<br>34813 patients   | cross-sectional (cohort type accurate) | not serious                                     | serious <sup>a</sup> | serious <sup>b</sup> | not serious | none             | 38 (36 to 39)                    | 38 (37 to 39)                  | 10 (9 to 10)                   | 10 (10 to 10)                  | 122 (117 to 126)              | 122 (118 to 125) | ⊕⊕○○<br>Low <sup>1,2,3,4,5,6,7,8,9,10,11,12,13</sup> |  |
|                                           |                                |                                        |                                                 |                      |                      |             |                  | <b>0 fewer TP in OC-sensor</b>   | <b>0 fewer TP in OC-sensor</b> | <b>0 fewer TP in OC-sensor</b> | <b>0 fewer TP in OC-sensor</b> |                               |                  |                                                      |  |







2. D'Souza, N, Delisle, T G, Chen, M, Benton, S C, Abulafi, M, Committee, Nice Fit Steering. Faecal immunochemical testing in symptomatic patients to prioritize investigation: diagnostic accuracy from NICE FIT Study. *British Journal of Surgery*; 2021.
3. D'Souza, N, Hicks, G, Benton, S C, Abulafi, M. The diagnostic accuracy of the faecal immunochemical test for colorectal cancer in risk-stratified symptomatic patients. *Annals of the Royal College of Surgeons of England*; 2020.
4. Farrugia, A, Widlak, M, Evans, C, Smith, S C, Arasaradnam, R. Faecal immunochemical testing (FIT) in symptomatic patients: What are we missing?. *Frontline Gastroenterology*; 2020.
5. Godber, I M, Todd, L M, Fraser, C G, MacDonald, L R, Younes, H B. Use of a faecal immunochemical test for haemoglobin can aid in the investigation of patients with lower abdominal symptoms. *Clinical Chemistry and Laboratory Medicine*; 2016.
6. Herrero, J M, Vega, P, Salve, M, Bujanda, L, Cubiella, J. Symptom or faecal immunochemical test based referral criteria for colorectal cancer detection in symptomatic patients: A diagnostic tests study. *BMC Gastroenterology*; 2018.
7. Khasawneh, F, Osborne, T, Stephenson, J, Barnes, D, Seehra, J, Danaher, P, Jones, J, Singh, B. Faecal immunochemical testing is a cost-effective way to stratify symptomatic patients for urgent straight to test investigation. *Colorectal Disease*; 2020.
8. Laszlo, Helga E, Seward, Edward, Ayling, Ruth, Lake, Jenny, Malhi, Aman, Hackshaw, Allan, Stephens, Clare, Pritchard-Jones, Kathy, Chung, Donna, Machesney, Michael. Quantitative faecal immunochemical test for patients with high risk bowel symptoms: a prospective cohort study. *medRxiv*; 2020.
9. McSorley, S, Witherspoon, P, Rigg, D, Burton, P, Winter, J. A colorectal referral pathway incorporating primary care faecal haemoglobin testing safely and effectively prioritises investigation. *Gut*; 2021.
10. Mowat, C., Digby, J., Strachan, J. A., Wilson, R., Carey, F. A., Fraser, C. G., Steele, R. J.. Faecal haemoglobin and faecal calprotectin as indicators of bowel disease in patients presenting to primary care with bowel symptoms. *Gut*; Sep 2016.
11. Rodriguez-Alonso, L, Rodriguez-Moranta, F, Ruiz-Cerulla, A, Lobaton, T, Arajol, C, Binefa, G, Moreno, V, Guardiola, J. An urgent referral strategy for symptomatic patients with suspected colorectal cancer based on a quantitative immunochemical faecal occult blood test. *Digestive and Liver Disease*; 2015.
12. Turvill, J L, Turnock, D, Cottingham, D, Haritakis, M, Jeffery, L, Girdwood, A, Hearfield, T, Mitchell, A, Keding, A. The Fast Track FIT study: Diagnostic accuracy of faecal immunochemical test for haemoglobin in patients with suspected colorectal cancer. *British Journal of General Practice*; 2021.
13. Morales Arraez, D E, Hernandez, G, Carrillo, M, Adrian, Z, Gimeno, A Z, Quintero, E. Role of faecal immunochemical testing in the diagnostic workup of patients with iron deficiency anaemia. *United European Gastroenterology Journal*; 2018.

**Table 5: Should FOB Gold vs. QuikRead go be used to diagnose CRC in in patients with all symptoms (NG12, DG30 or NC)?**

| FOB Gold                                  |                                | QuikRead go                                  |                                                 | Prevalences          |                      |             |                  |                                  |                              |                              |                              |                              |               |                                    |
|-------------------------------------------|--------------------------------|----------------------------------------------|-------------------------------------------------|----------------------|----------------------|-------------|------------------|----------------------------------|------------------------------|------------------------------|------------------------------|------------------------------|---------------|------------------------------------|
| Sensitivity                               | 0.94 (95% CI: 0.81 to 0.99)    | Sensitivity                                  | 0.92 (95% CI: 0.64 to 0.99)                     | 5.1%                 | 5%                   | 5.3%        |                  |                                  |                              |                              |                              |                              |               |                                    |
| Specificity                               | 0.75 (95% CI: 0.71 to 0.78)    | Specificity                                  | 0.77 (95% CI: 0.71 to 0.82)                     |                      |                      |             |                  |                                  |                              |                              |                              |                              |               |                                    |
| Outcome                                   | No of studies (No of patients) | Study design                                 | Factors that may decrease certainty of evidence |                      |                      |             |                  | Effect per 1,000 patients tested |                              |                              |                              |                              |               | Test accuracy CoE                  |
|                                           |                                |                                              | Risk of bias                                    | Indirectness         | Inconsistency        | Imprecision | Publication bias | pre-test probability of 5.1%     |                              | pre-test probability of 5%   |                              | pre-test probability of 5.3% |               |                                    |
|                                           |                                |                                              |                                                 |                      |                      |             |                  | FOB Gold                         | QuikRead go                  | FOB Gold                     | QuikRead go                  | FOB Gold                     | QuikRead go   |                                    |
| <b>True positives</b> (patients with CRC) | 1 studies (727 patients)       | cross-sectional (cohort type accuracy study) | serious <sup>a</sup>                            | serious <sup>b</sup> | serious <sup>c</sup> | not serious | none             | 48 (41 to 50)                    | 47 (33 to 50)                | 47 (41 to 50)                | 46 (32 to 50)                | 50 (43 to 52)                | 49 (34 to 52) | ⊕○○○<br>○<br>Very low <sup>1</sup> |
| <b>False negatives</b>                    |                                |                                              |                                                 |                      |                      |             |                  | <b>1 more TP in FOB Gold</b>     | <b>1 more TP in FOB Gold</b> | <b>1 more TP in FOB Gold</b> | <b>1 more TP in FOB Gold</b> | <b>1 more TP in FOB Gold</b> |               |                                    |
|                                           |                                |                                              |                                                 |                      |                      |             |                  | 3 (1 to 10)                      | 4 (1 to 18)                  | 3 (0 to 9)                   | 4 (0 to 18)                  | 3 (1 to 10)                  | 4 (1 to 19)   |                                    |

| Outcome                                             | No of studies (No of patients) | Study design                                 | Factors that may decrease certainty of evidence |                      |                      |             |                  | Effect per 1,000 patients tested |                  |                            |                  |                              |                  | Test accuracy CoE     |
|-----------------------------------------------------|--------------------------------|----------------------------------------------|-------------------------------------------------|----------------------|----------------------|-------------|------------------|----------------------------------|------------------|----------------------------|------------------|------------------------------|------------------|-----------------------|
|                                                     |                                |                                              |                                                 |                      |                      |             |                  | pre-test probability of 5.1%     |                  | pre-test probability of 5% |                  | pre-test probability of 5.3% |                  |                       |
|                                                     |                                |                                              | Risk of bias                                    | Indirectness         | Inconsistency        | Imprecision | Publication bias | FOB Gold                         | QuikRad go       | FOB Gold                   | QuikRad go       | FOB Gold                     | QuikRad go       |                       |
| (patients incorrectly classified as not having CRC) |                                |                                              |                                                 |                      |                      |             |                  |                                  |                  |                            |                  |                              |                  |                       |
| <b>True negatives</b> (patients without CRC)        | 1 studies<br>727 patients      | cross-sectional (cohort type accuracy study) | serious <sup>a</sup>                            | serious <sup>b</sup> | serious <sup>c</sup> | serious     | none             | 712 (674 to 740)                 | 731 (674 to 778) | 712 (675 to 741)           | 731 (675 to 779) | 710 (672 to 739)             | 729 (672 to 777) | ⊕○○○<br>○<br>Very low |
| <b>False positives</b> (patients                    |                                |                                              |                                                 |                      |                      |             |                  |                                  |                  |                            |                  |                              |                  |                       |
|                                                     |                                |                                              |                                                 |                      |                      |             |                  |                                  |                  |                            |                  |                              |                  |                       |

| Outcome                               | No of studies (No of patients) | Study design | Factors that may decrease certainty of evidence |              |               |             |                               | Effect per 1,000 patients tested |                               |                            |                               |                              |             | Test accuracy CoE |
|---------------------------------------|--------------------------------|--------------|-------------------------------------------------|--------------|---------------|-------------|-------------------------------|----------------------------------|-------------------------------|----------------------------|-------------------------------|------------------------------|-------------|-------------------|
|                                       |                                |              |                                                 |              |               |             |                               | pre-test probability of 5.1%     |                               | pre-test probability of 5% |                               | pre-test probability of 5.3% |             |                   |
|                                       |                                |              | Risk of bias                                    | Indirectness | Inconsistency | Imprecision | Publication bias              | FOB Gold                         | QuikRead go                   | FOB Gold                   | QuikRead go                   | FOB Gold                     | QuikRead go |                   |
| incorrectly classified as having CRC) |                                |              |                                                 |              |               |             | 275)                          |                                  | 275)                          |                            | 275)                          |                              |             |                   |
|                                       |                                |              |                                                 |              |               |             | <b>19 more FP in FOB Gold</b> |                                  | <b>19 more FP in FOB Gold</b> |                            | <b>19 more FP in FOB Gold</b> |                              |             |                   |

#### Explanations

- Tsapournas 2020 was judged at a high risk of bias in patient selection.
- Results based on indirect comparisons from different studies
- There was high amount of heterogeneity detected.

**Footnote:** CoE = certainty of evidence

#### References

- Navarro, M, Hijos, G, Sostres, C, Lue, A, Puente-Lanzarote, J J, Carrera-Lasfuentes, P, Lanas, A. Reducing the Cut-Off Value of the Fecal Immunochemical Test for Symptomatic Patients Does Not Improve Diagnostic Performance. *Frontiers in Medicine*; 2020.

**Table 6: Should CT colonography be preferred over colonoscopy for patients with non-specific symptoms including abdominal pain or weight loss?**

**Patient or population:** patients with non-specific symptoms including abdominal pain or weight loss

**Setting:** 2WW CRC pathway

**Intervention:** Is CT colonography preferred

**Comparison:** colonoscopy

| Outcomes                          | Impact                                                                                                                                                                                                                                            | No of participants (studies)    | Certainty of the evidence (GRADE) |
|-----------------------------------|---------------------------------------------------------------------------------------------------------------------------------------------------------------------------------------------------------------------------------------------------|---------------------------------|-----------------------------------|
| Patients' preference (Preference) | For patients recommended whole colon investigation as part of a 2WW CRC pathway, CTC is equivalent to colonoscopy for detection of CRC; and use of CTC can be determined by local teams according to audited performance, capacity and experience | 9822<br>(1 observational study) | ⊕⊕○○<br>Low <sup>1,2,a</sup>      |

\*The risk in the intervention group (and its 95% confidence interval) is based on the assumed risk in the comparison group and the relative effect of the intervention (and its 95% CI).

CI: confidence interval

#### GRADE Working Group grades of evidence

**High certainty:** we are very confident that the true effect lies close to that of the estimate of the effect.

**Moderate certainty:** we are moderately confident in the effect estimate: the true effect is likely to be close to the estimate of the effect, but there is a possibility that it is substantially different.

**Low certainty:** our confidence in the effect estimate is limited: the true effect may be substantially different from the estimate of the effect.

**Very low certainty:** we have very little confidence in the effect estimate: the true effect is likely to be substantially different from the estimate of effect.

*Explanations*

a. Study was judged to be at a high risk of bias.

*References*

1. D'Souza N, Delisle TG, Chen M, Benton S, Abulafi M, NICE FIT Steering Committee. Faecal immunochemical test is superior to symptoms in predicting pathology in patients with suspected colorectal cancer symptoms referred on a 2WW pathway; a diagnostic accuracy study. *Gut*; 2020.

2. Delisle, T G, D'Souza, N, Davies, B, Ward, H, Abulafi, M. Patient acceptability of a home colorectal cancer rule out test. *British Journal of Surgery*; 2020.

**Table 7: Should FIT be used to diagnose CRC in younger patients (<50)?**

| Sensitivity                                   |                                | 0.81 to 0.93                                 |                                                 | Prevalences          |               |             | 2.7%             | 1.5%                             | 3.9%                         |                              |                                |
|-----------------------------------------------|--------------------------------|----------------------------------------------|-------------------------------------------------|----------------------|---------------|-------------|------------------|----------------------------------|------------------------------|------------------------------|--------------------------------|
| Specificity                                   |                                | 0.83 to 0.88                                 |                                                 |                      |               |             |                  |                                  |                              |                              |                                |
| Outcome                                       | No of studies (No of patients) | Study design                                 | Factors that may decrease certainty of evidence |                      |               |             |                  | Effect per 1,000 patients tested |                              |                              | Test accuracy CoE              |
|                                               |                                |                                              | Risk of bias                                    | Indirectness         | Inconsistency | Imprecision | Publication bias | pre-test probability of 2.7%     | pre-test probability of 1.5% | pre-test probability of 3.9% |                                |
| <b>True positives</b> (patients with CRC)     | 2 studies (9969 patients)      | cross-sectional (cohort type accuracy study) | serious <sup>a</sup>                            | serious <sup>b</sup> | not serious   | not serious | none             | 22 to 25                         | 12 to 14                     | 32 to 36                     | ⊕⊕○<br>○<br>Low <sup>1,2</sup> |
| <b>False negatives</b> (patients incorrectly) |                                |                                              |                                                 |                      |               |             |                  | 2 to 5                           | 1 to 3                       | 3 to 7                       |                                |



| Outcome                                                                | No of studies (No of patients) | Study design                                 | Factors that may decrease certainty of evidence |                      |               |             |                  | Effect per 1,000 patients tested |                              |                              | Test accuracy CoE |
|------------------------------------------------------------------------|--------------------------------|----------------------------------------------|-------------------------------------------------|----------------------|---------------|-------------|------------------|----------------------------------|------------------------------|------------------------------|-------------------|
|                                                                        |                                |                                              | Risk of bias                                    | Indirectness         | Inconsistency | Imprecision | Publication bias | pre-test probability of 2.7%     | pre-test probability of 1.5% | pre-test probability of 3.9% |                   |
| Study classified as not having CRC)                                    |                                |                                              |                                                 |                      |               |             |                  |                                  |                              |                              |                   |
| <b>True negatives</b> (patients without CRC)                           | 2 studies (9969 patients)      | cross-sectional (cohort type accuracy study) | serious <sup>a</sup>                            | serious <sup>b</sup> | not serious   | not serious | none             | 808 to 856                       | 818 to 867                   | 798 to 846                   | ⊕⊕⊙<br>⊙<br>Low   |
| <b>False positives</b> (patients incorrectly classified as having CRC) |                                |                                              |                                                 |                      |               |             |                  | 117 to 165                       | 118 to 167                   | 115 to 163                   |                   |

*Explanations*

a. High risk of bias in patient selection

b. Results based on indirect comparisons from different studies

**Footnote:** CoE = certainty of evidence

### References

1. Lue, A, Hijos, G, Sostres, C, Perales, A, Navarro, M, Barra, M V, Mascialino, B, Andaluca, C, Puente, J J, Lanas, A, Gomollon, F. The combination of quantitative faecal occult blood test and faecal calprotectin is a cost-effective strategy to avoid colonoscopies in symptomatic patients without relevant pathology. *Therapeutic Advances in Gastroenterology*; 2020.
2. D'Souza, N, Monahan, K, Benton, S C, Wilde, L, Abulafi, M, Group, Nice Fit Steering. Finding the needle in the haystack: the diagnostic accuracy of the faecal immunochemical test for colorectal cancer in younger symptomatic patients. *Colorectal Disease*; 2021.

**Table 8: FIT compared to no test or no-return for risk of CRC**

**Patient or population:** risk of CRC

**Setting:** Various

**Intervention:** FIT

**Comparison:** no test or no-return

| Outcomes                                                      | Impact                                                                                                                                                                                                                                                                                                                                                                                                                                                                                                                                                                                                    | No of participants (studies) | Certainty of the evidence (GRADE) |
|---------------------------------------------------------------|-----------------------------------------------------------------------------------------------------------------------------------------------------------------------------------------------------------------------------------------------------------------------------------------------------------------------------------------------------------------------------------------------------------------------------------------------------------------------------------------------------------------------------------------------------------------------------------------------------------|------------------------------|-----------------------------------|
| Adherence (Adherence )<br>assessed with: Questionnaire/survey | We recommend that GPs should be advised that in a symptomatic patient with no recent FIT result (through lack of return of the kit or sample failure) evaluation of CRC risk is likely to be suboptimal. This is likely to be of an order greater than failing to consider well known “alarm” symptoms such as rectal bleeding or change in bowel habit. We recommend that patients who refuse to return a FIT test should be counselled that the absence of a result may impair their responsible clinician’s ability to correctly assess their risk of CRC and take appropriate action to address this. | (0 studies)                  | -                                 |

**Table 8: FIT compared to no test or no-return for risk of CRC****Patient or population:** risk of CRC**Setting:** Various**Intervention:** FIT**Comparison:** no test or no-return

| Outcomes | Impact | No of participants (studies) | Certainty of the evidence (GRADE) |
|----------|--------|------------------------------|-----------------------------------|
|----------|--------|------------------------------|-----------------------------------|

\***The risk in the intervention group** (and its 95% confidence interval) is based on the assumed risk in the comparison group and the **relative effect** of the intervention (and its 95% CI).

CI: confidence interval

**GRADE Working Group grades of evidence**

**High certainty:** we are very confident that the true effect lies close to that of the estimate of the effect.

**Moderate certainty:** we are moderately confident in the effect estimate: the true effect is likely to be close to the estimate of the effect, but there is a possibility that it is substantially different.

**Low certainty:** our confidence in the effect estimate is limited: the true effect may be substantially different from the estimate of the effect.

**Very low certainty:** we have very little confidence in the effect estimate: the true effect is likely to be substantially different from the estimate of effect.

**Table 9: Should FIT (HM-JACKarc) be used to diagnose CRC in similar in both high (NG12) and low risk (DG30) symptomatic patients (in any setting at the >10 cut-off, Tier 1)?**

| FIT (HM-JACKarc) DG30 |                             | FIT (HM-JACKarc) NG12 |                             |
|-----------------------|-----------------------------|-----------------------|-----------------------------|
| Sensitivity           | 0.88 (95% CI: 0.78 to 0.95) | Sensitivity           | 0.89 (95% CI: 0.82 to 0.93) |
| Specificity           | 0.88 (95% CI: 0.87 to 0.89) | Specificity           | 0.81 (95% CI: 0.79 to 0.82) |

| Prevalences | 4.6% | 3.3% | 6% |
|-------------|------|------|----|
|             |      |      |    |

| Outcome                                     | No of studies (No of patients) | Study design                                 | Factors that may decrease certainty of evidence |                      |                      |             |                  | Effect per 1,000 patients tested           |                                            |                                            |                       |                            |                       | Test accuracy CoE     |
|---------------------------------------------|--------------------------------|----------------------------------------------|-------------------------------------------------|----------------------|----------------------|-------------|------------------|--------------------------------------------|--------------------------------------------|--------------------------------------------|-----------------------|----------------------------|-----------------------|-----------------------|
|                                             |                                |                                              |                                                 |                      |                      |             |                  | pre-test probability of 4.6%               |                                            | pre-test probability of 3.3%               |                       | pre-test probability of 6% |                       |                       |
|                                             |                                |                                              | Risk of bias                                    | Indirectness         | Inconsistency        | Imprecision | Publication bias | FIT (HM-JACKarc) DG30                      | FIT (HM-JACKarc) NG12                      | FIT (HM-JACKarc) DG30                      | FIT (HM-JACKarc) NG12 | FIT (HM-JACKarc) DG30      | FIT (HM-JACKarc) NG12 |                       |
| <b>True positives</b> (patients with CRC)   | 4 studies (11464 patients)     | cross-sectional (cohort type accuracy study) | serious <sup>1,2,3,4,a</sup>                    | serious <sup>b</sup> | serious <sup>c</sup> | not serious | none             | 40 (36 to 44)                              | 41 (38 to 43)                              | 29 (26 to 31)                              | 29 (27 to 31)         | 53 (47 to 57)              | 53 (49 to 56)         | ⊕○○○<br>○<br>Very low |
| <b>1 fewer TP in FIT (HM-JACKarc) DG30</b>  |                                |                                              |                                                 |                      |                      |             |                  | <b>0 fewer TP in FIT (HM-JACKarc) DG30</b> |                                            | <b>0 fewer TP in FIT (HM-JACKarc) DG30</b> |                       |                            |                       |                       |
| 6 (2 to 10)                                 |                                |                                              |                                                 |                      |                      |             |                  | 5 (3 to 8)                                 | 4 (2 to 7)                                 | 4 (2 to 6)                                 | 7 (3 to 13)           | 7 (4 to 11)                |                       |                       |
| <b>False negatives</b> (patients incorrect) |                                |                                              |                                                 |                      |                      |             |                  | <b>1 more FN in FIT (HM-JACKarc) DG30</b>  | <b>0 fewer FN in FIT (HM-JACKarc) DG30</b> | <b>0 fewer FN in FIT (HM-JACKarc) DG30</b> |                       |                            |                       |                       |

| Outcome                                      | No of studies (No of patients) | Study design                                 | Factors that may decrease certainty of evidence |                      |                      |             |                  | Effect per 1,000 patients tested           |                                            |                                            |                       |                            |                       | Test accuracy CoE     |
|----------------------------------------------|--------------------------------|----------------------------------------------|-------------------------------------------------|----------------------|----------------------|-------------|------------------|--------------------------------------------|--------------------------------------------|--------------------------------------------|-----------------------|----------------------------|-----------------------|-----------------------|
|                                              |                                |                                              |                                                 |                      |                      |             |                  | pre-test probability of 4.6%               |                                            | pre-test probability of 3.3%               |                       | pre-test probability of 6% |                       |                       |
|                                              |                                |                                              | Risk of bias                                    | Indirectness         | Inconsistency        | Imprecision | Publication bias | FIT (HM-JACKarc) DG30                      | FIT (HM-JACKarc) NG12                      | FIT (HM-JACKarc) DG30                      | FIT (HM-JACKarc) NG12 | FIT (HM-JACKarc) DG30      | FIT (HM-JACKarc) NG12 |                       |
| tly classified as not having CRC)            |                                |                                              |                                                 |                      |                      |             |                  |                                            |                                            |                                            |                       |                            |                       |                       |
| <b>True negatives</b> (patients without CRC) | 4 studies (11464 patients)     | cross-sectional (cohort type accuracy study) | serious <sup>a</sup>                            | serious <sup>b</sup> | serious <sup>c</sup> | not serious | none             | 840 (830 to 849)                           | 773 (754 to 782)                           | 851 (841 to 861)                           | 783 (764 to 793)      | 827 (818 to 837)           | 761 (743 to 771)      | ⊕○○○<br>○<br>Very low |
| <b>False positives</b> (patients             |                                |                                              |                                                 |                      |                      |             |                  | <b>67 more TN in FIT (HM-JACKarc) DG30</b> | <b>68 more TN in FIT (HM-JACKarc) DG30</b> | <b>66 more TN in FIT (HM-JACKarc) DG30</b> |                       |                            |                       |                       |
|                                              |                                |                                              |                                                 |                      |                      |             |                  | 114 (105 to 124)                           | 181 (172 to 200)                           | 116 (106 to 126)                           | 184 (174 to 203)      | 113 (103 to 122)           | 179 (169 to 197)      |                       |

| Outcome                                 | No of studies (No of patients) | Study design | Factors that may decrease certainty of evidence |              |               |             |                  | Effect per 1,000 patients tested |                       |                              |                       |                            |                       | Test accuracy CoE |
|-----------------------------------------|--------------------------------|--------------|-------------------------------------------------|--------------|---------------|-------------|------------------|----------------------------------|-----------------------|------------------------------|-----------------------|----------------------------|-----------------------|-------------------|
|                                         |                                |              |                                                 |              |               |             |                  | pre-test probability of 4.6%     |                       | pre-test probability of 3.3% |                       | pre-test probability of 6% |                       |                   |
|                                         |                                |              | Risk of bias                                    | Indirectness | Inconsistency | Imprecision | Publication bias | FIT (HM-JACKarc) DG30            | FIT (HM-JACKarc) NG12 | FIT (HM-JACKarc) DG30        | FIT (HM-JACKarc) NG12 | FIT (HM-JACKarc) DG30      | FIT (HM-JACKarc) NG12 |                   |
| s incorrectly classified as having CRC) |                                |              |                                                 |              |               |             |                  |                                  |                       |                              |                       |                            |                       |                   |

#### Explanations

- a. Farrugia 2020 was judged to be at a high risk of bias for flow and timing; D'Souza 2020 was judged to be at a high risk of bias for patient selection.
- b. Results based on indirect comparisons from different studies; direct evidence about impact on patient-important outcomes missing.
- c. Significant heterogeneity for sensitivity detected.

**Footnote:** CoE = certainty of evidence

#### References

1. D'Souza, N., Georgiou Delisle, T., Chen, M., Benton, S., Abulafi, M.. Faecal immunochemical test is superior to symptoms in predicting pathology in patients with suspected colorectal cancer symptoms referred on a 2WW pathway: A diagnostic accuracy study. *Gut*; 2021.
2. Chapman, C. J., Banerjee, A., Humes, D. J., Allen, J., Oliver, S., Ford, A., Hardy, K., Djedovic, N., Logan, R. F., Morling, J. R.. Choice of faecal immunochemical test matters: comparison of OC-Sensor and HM-JACKarc, in the assessment of patients at high risk of colorectal cancer. *Clin Chem Lab Med*; Oct 29 2020.

3.D'Souza N, Delisle TG, Chen M, Benton S, Abulafi M, NICE FIT Steering Committee. Faecal immunochemical test is superior to symptoms in predicting pathology in patients with suspected colorectal cancer symptoms referred on a 2WW pathway; a diagnostic accuracy study. *Gut*; 2020.

4.Farrugia, A, Widlak, M, Evans, C, Smith, S C, Arasaradnam, R. Faecal immunochemical testing (FIT) in symptomatic patients: What are we missing?. *Frontline Gastroenterology*; 2020.

**Table 10: Should FIT (OC-sensor) be used to diagnose CRC in in patients with rectal bleeding (in primary care at >10 cut-off)?**

| Sensitivity                                                                |                                | 0.96 (95% CI: 0.80 to 0.99)                  |                                                 | Prevalences          |               | 5.6%                 |                  |                                  |                   |
|----------------------------------------------------------------------------|--------------------------------|----------------------------------------------|-------------------------------------------------|----------------------|---------------|----------------------|------------------|----------------------------------|-------------------|
| Specificity                                                                |                                | 0.38 (95% CI: 0.33 to 0.43)                  |                                                 |                      |               |                      |                  |                                  |                   |
| Outcome                                                                    | No of studies (No of patients) | Study design                                 | Factors that may decrease certainty of evidence |                      |               |                      |                  | Effect per 1,000 patients tested | Test accuracy CoE |
|                                                                            |                                |                                              | Risk of bias                                    | Indirectness         | Inconsistency | Imprecision          | Publication bias | pre-test probability of 5.6%     |                   |
| <b>True positives</b> (patients with CRC)                                  | 1 studies<br>462 patients      | cross-sectional (cohort type accuracy study) | serious <sup>1,a</sup>                          | serious <sup>b</sup> | not serious   | serious <sup>c</sup> | none             | 54 (45 to 55)                    | ⊕○○○<br>Very low  |
| <b>False negatives</b> (patients incorrectly classified as not having CRC) |                                |                                              |                                                 |                      |               |                      |                  | 2 (1 to 11)                      |                   |

| Outcome                                                                   | No of studies (No of patients) | Study design                                    | Factors that may decrease certainty of evidence |                      |               |                      |                  | Effect per 1,000 patients tested | Test accuracy CoE |
|---------------------------------------------------------------------------|--------------------------------|-------------------------------------------------|-------------------------------------------------|----------------------|---------------|----------------------|------------------|----------------------------------|-------------------|
|                                                                           |                                |                                                 | Risk of bias                                    | Indirectness         | Inconsistency | Imprecision          | Publication bias | pre-test probability of 5.6%     |                   |
| <b>True negatives</b><br>(patients without CRC)                           | 1 studies<br>462 patients      | cross-sectional<br>(cohort type accuracy study) | serious <sup>a</sup>                            | serious <sup>b</sup> | not serious   | serious <sup>c</sup> | none             | 359 (312 to 406)                 | ⊕○○○<br>Very low  |
| <b>False positives</b><br>(patients incorrectly classified as having CRC) |                                |                                                 |                                                 |                      |               |                      |                  | 585 (538 to 632)                 |                   |

#### Explanations

- a. Mowat/Digby was judged to be at a high risk of bias for flow and timing; and a high risk of bias for patient selection.  
 b. direct evidence about impact on patient-important outcomes is missing.  
 c. Wide confidence intervals

**Footnote:** CoE = certainty of evidence

#### References

1. Mowat, C., Digby, J., Strachan, J. A., Wilson, R., Carey, F. A., Fraser, C. G., Steele, R. J.. Faecal haemoglobin and faecal calprotectin as indicators of bowel disease in patients presenting to primary care with bowel symptoms. *Gut*; Sep 2016.

**Table 11: Should FIT (HM-JACKarc) be used to diagnose CRC in iron deficiency anaemia?**



| Sensitivity                                                                |                                | 1.00 (95% CI: 0.89 to 1.00)                  |                                                 |                      |               |                      |                  | Prevalences 3.3%                 |                            |                            |                       |
|----------------------------------------------------------------------------|--------------------------------|----------------------------------------------|-------------------------------------------------|----------------------|---------------|----------------------|------------------|----------------------------------|----------------------------|----------------------------|-----------------------|
| Specificity                                                                |                                | 0.81 (95% CI: 0.77 to 0.85)                  |                                                 |                      |               |                      |                  |                                  |                            |                            |                       |
| Outcome                                                                    | No of studies (No of patients) | Study design                                 | Factors that may decrease certainty of evidence |                      |               |                      |                  | Effect per 1,000 patients tested |                            |                            | Test accuracy CoE     |
|                                                                            |                                |                                              | Risk of bias                                    | Indirectness         | Inconsistency | Imprecision          | Publication bias | pre-test probability of 3.3%     | pre-test probability of 0% | pre-test probability of 0% |                       |
| <b>True positives</b> (patients with CRC)                                  | 1 studies (479 patients)       | cross-sectional (cohort type accuracy study) | serious <sup>1, a</sup>                         | serious <sup>b</sup> | not serious   | serious <sup>c</sup> | none             | 33 (29 to 33)                    | 0 (0 to 0)                 | 0 (0 to 0)                 | ⊕○○○<br>○<br>Very low |
| <b>False negatives</b> (patients incorrectly classified as not having CRC) |                                |                                              |                                                 |                      |               |                      |                  | 0 (0 to 4)                       | 0 (0 to 0)                 | 0 (0 to 0)                 |                       |
| <b>True negatives</b> (patients without CRC)                               | 1 studies (479 patients)       | cross-sectional (cohort type)                | serious <sup>a</sup>                            | serious <sup>b</sup> | not serious   | serious <sup>c</sup> | none             | 783 (745 to 822)                 | 810 (770 to 850)           | 810 (770 to 850)           | ⊕○○○<br>○<br>Very low |

| Outcome                                                                | No of studies (No of patients) | Study design    | Factors that may decrease certainty of evidence |              |               |             |                  | Effect per 1,000 patients tested |                            |                            | Test accuracy CoE |
|------------------------------------------------------------------------|--------------------------------|-----------------|-------------------------------------------------|--------------|---------------|-------------|------------------|----------------------------------|----------------------------|----------------------------|-------------------|
|                                                                        |                                |                 | Risk of bias                                    | Indirectness | Inconsistency | Imprecision | Publication bias | pre-test probability of 3.3%     | pre-test probability of 0% | pre-test probability of 0% |                   |
| <b>False positives</b> (patients incorrectly classified as having CRC) |                                | accuracy study) |                                                 |              |               |             |                  | 184 (145 to 222)                 | 190 (150 to 230)           | 190 (150 to 230)           |                   |

#### Explanations

- D'Souza 2021 was judged to be at a high risk of bias for patient selection.
- direct evidence about impact on patient-important outcomes is missing
- Wide confidence intervals for sensitivity and specificity

**Footnote:** CoE = certainty of evidence

#### References

- D'Souza, N, Delisle, T G, Chen, M, Benton, S C, Abulafi, M, Committee, Nice Fit Steering. Faecal immunochemical testing in symptomatic patients to prioritize investigation: diagnostic accuracy from NICE FIT Study. British Journal of Surgery; 2021.

**Table 12: Should FIT (OC-sensor) be used to diagnose CRC in those with isolated change in bowel habits?**

|             |                             |             |      |
|-------------|-----------------------------|-------------|------|
| Sensitivity | 0.88 (95% CI: 0.79 to 0.95) | Prevalences | 1.2% |
| Specificity | 0.80 (95% CI: 0.79 to 0.81) |             |      |

| Outcome                                                                    | No of studies (No of patients) | Study design                                 | Factors that may decrease certainty of evidence |                      |               |                      |                                                  | Effect per 1,000 patients tested | Test accuracy CoE |                  |
|----------------------------------------------------------------------------|--------------------------------|----------------------------------------------|-------------------------------------------------|----------------------|---------------|----------------------|--------------------------------------------------|----------------------------------|-------------------|------------------|
|                                                                            |                                |                                              | Risk of bias                                    | Indirectness         | Inconsistency | Imprecision          | Publication bias                                 | pre-test probability of 1.2%     |                   |                  |
| <b>True positives</b> (patients with CRC)                                  | 1 study<br>5818 patients       | cross-sectional (cohort type accuracy study) | serious <sup>1,a</sup>                          | serious <sup>b</sup> | not serious   | serious <sup>c</sup> | publication bias strongly suspected <sup>d</sup> | 11 (9 to 11)                     | ⊕○○○<br>Very low  |                  |
| <b>False negatives</b> (patients incorrectly classified as not having CRC) |                                |                                              |                                                 |                      |               |                      |                                                  | 1 (1 to 3)                       |                   |                  |
| <b>True negatives</b> (patients without CRC)                               | 1 study<br>5818 patients       | cross-sectional (cohort type accuracy study) | serious <sup>a</sup>                            | serious <sup>b</sup> | not serious   | serious <sup>c</sup> | publication bias strongly suspected <sup>d</sup> | 790 (781 to 800)                 |                   | ⊕○○○<br>Very low |
| <b>False positives</b> (patients incorrectly classified as having CRC)     |                                |                                              |                                                 |                      |               |                      |                                                  | 198 (188 to 207)                 |                   |                  |

#### Explanations

- Khasawneh 2020 was judged to be at an unclear risk of bias.
- direct evidence about impact on patient-important outcomes is missing.
- Wide confidence intervals for sensitivity

d. Results based on a single study

**Footnote:** CoE = certainty of evidence

#### References

1. Khasawneh, F, Osborne, T, Stephenson, J, Barnes, D, Seehra, J, Danaher, P, Jones, J, Singh, B. Faecal immunochemical testing is a cost-effective way to stratify symptomatic patients for urgent straight to test investigation. *Colorectal Disease*; 2020.

**Table 13: Should FIT (OC-sensor) be used to diagnose CRC in in patients with CIBH or RB at thresholds >4 to >10 in primary care?**

| Sensitivity                                 |                                | 0.91 to 0.96                                 |                                                 | Prevalences          |                      |             | 0%               | 1.2%                             | 5.6%                         |                              |                                      |
|---------------------------------------------|--------------------------------|----------------------------------------------|-------------------------------------------------|----------------------|----------------------|-------------|------------------|----------------------------------|------------------------------|------------------------------|--------------------------------------|
| Specificity                                 |                                | 0.38 to 0.69                                 |                                                 |                      |                      |             |                  |                                  |                              |                              |                                      |
| Outcome                                     | No of studies (No of patients) | Study design                                 | Factors that may decrease certainty of evidence |                      |                      |             |                  | Effect per 1,000 patients tested |                              |                              | Test accuracy CoE                    |
|                                             |                                |                                              | Risk of bias                                    | Indirectness         | Inconsistency        | Imprecision | Publication bias | pre-test probability of 0%       | pre-test probability of 1.2% | pre-test probability of 5.6% |                                      |
| <b>True positives</b> (patients with CRC)   | 2 studies (6280 patients)      | cross-sectional (cohort type accuracy study) | serious <sup>a</sup>                            | serious <sup>b</sup> | serious <sup>c</sup> | not serious | none             | 0 to 0                           | 11 to 12                     | 51 to 54                     | ⊕○○○<br>○<br>Very low <sup>1,2</sup> |
| <b>False negatives</b> (patients incorrect) |                                |                                              |                                                 |                      |                      |             |                  | 0 to 0                           | 0 to 1                       | 2 to 5                       |                                      |

| Outcome                                                                | No of studies (No of patients) | Study design                                 | Factors that may decrease certainty of evidence |                      |                      |             |                  | Effect per 1,000 patients tested |                              |                              | Test accuracy CoE     |
|------------------------------------------------------------------------|--------------------------------|----------------------------------------------|-------------------------------------------------|----------------------|----------------------|-------------|------------------|----------------------------------|------------------------------|------------------------------|-----------------------|
|                                                                        |                                |                                              | Risk of bias                                    | Indirectness         | Inconsistency        | Imprecision | Publication bias | pre-test probability of 0%       | pre-test probability of 1.2% | pre-test probability of 5.6% |                       |
| Study classified as not having CRC)                                    |                                |                                              |                                                 |                      |                      |             |                  |                                  |                              |                              |                       |
| <b>True negatives</b> (patients without CRC)                           | 2 studies (6280 patients)      | cross-sectional (cohort type accuracy study) | serious <sup>a</sup>                            | serious <sup>b</sup> | serious <sup>c</sup> | not serious | none             | 380 to 690                       | 375 to 682                   | 359 to 651                   | ⊕○○○<br>○<br>Very low |
| <b>False positives</b> (patients incorrectly classified as having CRC) |                                |                                              |                                                 |                      |                      |             |                  | 310 to 620                       | 306 to 613                   | 293 to 585                   |                       |

#### Explanations

a. Khasawneh 2020 was judged to be at an unclear risk of bias in all domains.

b. Results based on indirect comparisons from different studies; direct evidence about impact on patient-important outcomes is missing

c. Significant heterogeneity detected for both sensitivity and specificity

**Footnote:** CoE = certainty of evidence

### References

- 1.Khasawneh, F, Osborne, T, Stephenson, J, Barnes, D, Seehra, J, Danaher, P, Jones, J, Singh, B. Faecal immunochemical testing is a cost-effective way to stratify symptomatic patients for urgent straight to test investigation. *Colorectal Disease*; 2020.
- 2.Digby, J, Strachan, J A, McCann, R, Steele, R J C, Fraser, C G, Mowat, C. Measurement of faecal haemoglobin with a faecal immunochemical test can assist in defining which patients attending primary care with rectal bleeding require urgent referral. *Annals of Clinical Biochemistry*; 2020.

**Table 14: Should FIT in primary care vs. FIT in secondary care be used to diagnose CRC in adults with lower gastrointestinal signs or symptoms (at >10) and in all symptoms (NG12, DG30 and NC)?**

| FIT in primary care |                             | FIT in secondary care |                             |
|---------------------|-----------------------------|-----------------------|-----------------------------|
| Sensitivity         | 0.91 (95% CI: 0.85 to 0.94) | Sensitivity           | 0.91 (95% CI: 0.88 to 0.93) |
| Specificity         | 0.71 (95% CI: 0.57 to 0.82) | Specificity           | 0.79 (95% CI: 0.74 to 0.83) |

|             |      |      |       |
|-------------|------|------|-------|
| Prevalences | 5.2% | 1.2% | 13.6% |
|-------------|------|------|-------|

| Outcome                                                                       | No of studies (No of patients)                               | Study design    | Factors that may decrease certainty of evidence |                      |                      |             |                    | Effect per 1,000 patients tested         |                       |                                          |                       |                               |                       | Test accuracy<br>CoE                             |
|-------------------------------------------------------------------------------|--------------------------------------------------------------|-----------------|-------------------------------------------------|----------------------|----------------------|-------------|--------------------|------------------------------------------|-----------------------|------------------------------------------|-----------------------|-------------------------------|-----------------------|--------------------------------------------------|
|                                                                               |                                                              |                 |                                                 |                      |                      |             |                    | pre-test probability of 5.2%             |                       | pre-test probability of 1.2%             |                       | pre-test probability of 13.6% |                       |                                                  |
|                                                                               |                                                              |                 | Risk of bias                                    | Indirectness         | Inconsistency        | Imprecision | Publication bias   | FIT in primary care                      | FIT in secondary care | FIT in primary care                      | FIT in secondary care | FIT in primary care           | FIT in secondary care |                                                  |
| <b>True positives</b><br>(patients with CRC)                                  | 13 studies<br>34357 patients<br>(cohort type accuracy study) | cross-sectional | serious <sup>a</sup>                            | serious <sup>b</sup> | serious <sup>c</sup> | not serious | strong association | 47 (44 to 49)                            | 47 (46 to 48)         | 11 (10 to 11)                            | 11 (11 to 11)         | 124 (116 to 128)              | 124 (120 to 126)      | <br>Low <sup>1,2,3,4,5,6,7,8,9,10,11,12,13</sup> |
| <b>0 fewer TP in FIT in primary care</b>                                      |                                                              |                 |                                                 |                      |                      |             |                    | <b>0 fewer TP in FIT in primary care</b> |                       | <b>0 fewer TP in FIT in primary care</b> |                       |                               |                       |                                                  |
| 5 (3 to 8)                                                                    |                                                              |                 |                                                 |                      |                      |             |                    | 5 (4 to 6)                               | 1 (1 to 2)            | 1 (1 to 1)                               | 12 (8 to 20)          | 12 (10 to 16)                 |                       |                                                  |
| <b>0 fewer FN in FIT in primary care</b>                                      |                                                              |                 |                                                 |                      |                      |             |                    | <b>0 fewer FN in FIT in primary care</b> |                       | <b>0 fewer FN in FIT in primary care</b> |                       |                               |                       |                                                  |
| <b>False negatives</b><br>(patients incorrectly classified as not having CRC) |                                                              |                 |                                                 |                      |                      |             |                    |                                          |                       |                                          |                       |                               |                       |                                                  |

| Outcome                                         | No of studies (No of patients) | Study design                                 | Factors that may decrease certainty of evidence |                      |                      |             |                    | Effect per 1,000 patients tested          |                       |                                           |                       |                               |                       | Test accuracy<br>CoE |
|-------------------------------------------------|--------------------------------|----------------------------------------------|-------------------------------------------------|----------------------|----------------------|-------------|--------------------|-------------------------------------------|-----------------------|-------------------------------------------|-----------------------|-------------------------------|-----------------------|----------------------|
|                                                 |                                |                                              |                                                 |                      |                      |             |                    | pre-test probability of 5.2%              |                       | pre-test probability of 1.2%              |                       | pre-test probability of 13.6% |                       |                      |
|                                                 |                                |                                              | Risk of bias                                    | Indirectness         | Inconsistency        | Imprecision | Publication bias   | FIT in primary care                       | FIT in secondary care | FIT in primary care                       | FIT in secondary care | FIT in primary care           | FIT in secondary care |                      |
| <b>True negatives</b><br>(patients without CRC) | 13 studies<br>34357 patients   | cross-sectional (cohort type accuracy study) | serious <sup>a</sup>                            | serious <sup>b</sup> | serious <sup>c</sup> | not serious | strong association | 673 (540 to 777)                          | 749 (702 to 787)      | 701 (563 to 810)                          | 781 (731 to 820)      | 613 (492 to 708)              | 683 (639 to 717)      | ⊕⊕○○<br>Low          |
| <b>76 fewer TN in FIT in primary care</b>       |                                |                                              |                                                 |                      |                      |             |                    | <b>80 fewer TN in FIT in primary care</b> |                       | <b>70 fewer TN in FIT in primary care</b> |                       |                               |                       |                      |
| 275 (171 to 408)                                |                                |                                              |                                                 |                      |                      |             |                    | 199 (161 to 246)                          | 287 (178 to 425)      | 207 (168 to 257)                          | 251 (156 to 372)      | 181 (147 to 225)              |                       |                      |
| <b>76 more FP in FIT in primary care</b>        |                                |                                              |                                                 |                      |                      |             |                    | <b>80 more FP in FIT in primary care</b>  |                       | <b>70 more FP in FIT in primary care</b>  |                       |                               |                       |                      |



### Explanations

- a. Studies were judged at a high risk of bias in patient selection e.g., McSorley 2020, Mowat 2016.
- b. Results based on indirect comparisons from different studies; direct evidence about impact on patient-important outcomes is missing
- c. Significant heterogeneity detected for specificity

**Footnote:** CoE = certainty of evidence

### References

1. Chapman, C, Thomas, C, Morling, J, Tangri, A, Oliver, S, Simpson, J A, Humes, D J, Banerjee, A. Early clinical outcomes of a rapid colorectal cancer diagnosis pathway using faecal immunochemical testing in Nottingham. *Colorectal Disease*; 2020.
2. D'Souza, N, Delisle, T G, Chen, M, Benton, S C, Abulafi, M, Committee, Nice Fit Steering. Faecal immunochemical testing in symptomatic patients to prioritize investigation: diagnostic accuracy from NICE FIT Study. *British Journal of Surgery*; 2021.
3. D'Souza, N, Hicks, G, Benton, S C, Abulafi, M. The diagnostic accuracy of the faecal immunochemical test for colorectal cancer in risk-stratified symptomatic patients. *Annals of the Royal College of Surgeons of England*; 2020.
4. Farrugia, A, Widlak, M, Evans, C, Smith, S C, Arasaradnam, R. Faecal immunochemical testing (FIT) in symptomatic patients: What are we missing?. *Frontline Gastroenterology*; 2020.
5. Godber, I M, Todd, L M, Fraser, C G, MacDonald, L R, Younes, H B. Use of a faecal immunochemical test for haemoglobin can aid in the investigation of patients with lower abdominal symptoms. *Clinical Chemistry and Laboratory Medicine*; 2016.
6. Herrero, J M, Vega, P, Salve, M, Bujanda, L, Cubiella, J. Symptom or faecal immunochemical test based referral criteria for colorectal cancer detection in symptomatic patients: A diagnostic tests study. *BMC Gastroenterology*; 2018.
7. Khasawneh, F, Osborne, T, Stephenson, J, Barnes, D, Seehra, J, Danaher, P, Jones, J, Singh, B. Faecal immunochemical testing is a cost-effective way to stratify symptomatic patients for urgent straight to test investigation. *Colorectal Disease*; 2020.
8. McSorley, S, Witherspoon, P, Rigg, D, Burton, P, Winter, J. A colorectal referral pathway incorporating primary care faecal haemoglobin testing safely and effectively prioritises investigation. *Gut*; 2021.
9. Mowat, C, Digby, J, Strachan, J A, Wilson, R, Carey, F A, Fraser, C G, Steele, R J C. Faecal haemoglobin and faecal calprotectin as indicators of bowel disease in patients presenting to primary care with bowel symptoms. *Gut*; 2016.
10. Rodriguez-Alonso, L, Rodriguez-Moranta, F, Ruiz-Cerulla, A, Lobaton, T, Arajol, C, Binefa, G, Moreno, V, Guardiola, J. An urgent referral strategy for symptomatic patients with suspected colorectal cancer based on a quantitative immunochemical faecal occult blood test. *Digestive and Liver Disease*; 2015.
11. Tsapournas, G, Hellstrom, P M, Cao, Y, Olsson, L I. Diagnostic accuracy of a quantitative faecal immunochemical test vs. symptoms suspected for colorectal cancer in patients referred for colonoscopy. *Scandinavian Journal of Gastroenterology*; 2020.

12. Turvill, J L, Turnock, D, Cottingham, D, Haritakis, M, Jeffery, L, Girdwood, A, Hearfield, T, Mitchell, A, Keding, A. The Fast Track FIT study: Diagnostic accuracy of faecal immunochemical test for haemoglobin in patients with suspected colorectal cancer. *British Journal of General Practice*; 2021.

13. Hicks, G, D'Souza, N, Georgiou Delisle, T, Chen, M, Benton, S C, Abulafi, M. Using the faecal immunochemical test in patients with rectal bleeding: evidence from the NICE FIT study. *Colorectal Disease*; 2021.

**Question:** Should FIT be used to diagnose CRC in aspirin users ?

| Sensitivity                                   | 0.88 (95% CI: 0.75 to 0.95)    |                                              | Prevalence                                      |              | 10.5%         |                      |                                                  |                                  |                   |
|-----------------------------------------------|--------------------------------|----------------------------------------------|-------------------------------------------------|--------------|---------------|----------------------|--------------------------------------------------|----------------------------------|-------------------|
| Specificity                                   | 0.66 (95% CI: 0.62 to 0.71)    |                                              |                                                 |              |               |                      |                                                  |                                  |                   |
| Outcome                                       | No of studies (No of patients) | Study design                                 | Factors that may decrease certainty of evidence |              |               |                      |                                                  | Effect per 1,000 patients tested | Test accuracy CoE |
|                                               |                                |                                              | Risk of bias                                    | Indirectness | Inconsistency | Imprecision          | Publication bias                                 | pre-test probability of 10.5%    |                   |
| <b>True positives</b> (patients with CRC)     | 1 study<br>485 patients        | cross-sectional (cohort type accuracy study) | serious <sup>a</sup>                            | not serious  | not serious   | serious <sup>b</sup> | publication bias strongly suspected <sup>c</sup> | 92 (79 to 100)                   | ⊕○○○<br>Very low  |
| <b>False negatives</b> (patients incorrectly) |                                |                                              |                                                 |              |               |                      |                                                  | 13 (5 to 26)                     |                   |

| Outcome                                                                   | No of studies (No of patients) | Study design                                    | Factors that may decrease certainty of evidence |              |               |                      |                                                  | Effect per 1,000 patients tested | Test accuracy CoE |
|---------------------------------------------------------------------------|--------------------------------|-------------------------------------------------|-------------------------------------------------|--------------|---------------|----------------------|--------------------------------------------------|----------------------------------|-------------------|
|                                                                           |                                |                                                 | Risk of bias                                    | Indirectness | Inconsistency | Imprecision          | Publication bias                                 | pre-test probability of 10.5%    |                   |
| classified as not having CRC)                                             |                                |                                                 |                                                 |              |               |                      |                                                  |                                  |                   |
| <b>True negatives</b><br>(patients without CRC)                           | 1 study<br>485 patients        | cross-sectional<br>(cohort type accuracy study) | serious <sup>a</sup>                            | not serious  | not serious   | serious <sup>b</sup> | publication bias strongly suspected <sup>c</sup> | 591 (555 to 635)                 | ⊕○○○<br>Very low  |
| <b>False positives</b><br>(patients incorrectly classified as having CRC) |                                |                                                 |                                                 |              |               |                      |                                                  | 304 (260 to 340)                 |                   |

*Explanations*

- a. Poor representativeness of the population.  
b. Wide confidence intervals; small sample <500 participants  
c. Results based on a single study

**References:**

[1] Bujanda L, Sarasqueta C, Vega P, Salve M, Quintero E, Alvarez-Sanchez V, et al. Effect of aspirin on the diagnostic accuracy of the faecal immunochemical test for colorectal advanced neoplasia. *United European Gastroenterol J* 2018;6(1):123-130.

**Question:** Should FIT be used to diagnose CRC in females in secondary care (threshold:  $\geq 10 \mu\text{g Hb/g}$ )?

| Sensitivity                                                                |                                | 0.76 to 0.88                                 |                                                 | Prevalences          |               | 1.1%        | 4.5%             |                                  |                              |                   |
|----------------------------------------------------------------------------|--------------------------------|----------------------------------------------|-------------------------------------------------|----------------------|---------------|-------------|------------------|----------------------------------|------------------------------|-------------------|
| Specificity                                                                |                                | 0.82 to 0.85                                 |                                                 |                      |               |             |                  |                                  |                              |                   |
| Outcome                                                                    | No of studies (No of patients) | Study design                                 | Factors that may decrease certainty of evidence |                      |               |             |                  | Effect per 1,000 patients tested |                              | Test accuracy CoE |
|                                                                            |                                |                                              | Risk of bias                                    | Indirectness         | Inconsistency | Imprecision | Publication bias | pre-test probability of 1.1%     | pre-test probability of 4.5% |                   |
| <b>True positives</b> (patients with CRC)                                  | 2 studies<br>21435 patients    | cross-sectional (cohort type accuracy study) | serious <sup>a</sup>                            | serious <sup>b</sup> | not serious   | not serious | none             | 8 to 10                          | 34 to 40                     | ⊕⊕○○<br>Low       |
| <b>False negatives</b> (patients incorrectly classified as not having CRC) |                                |                                              |                                                 |                      |               |             |                  | 1 to 3                           | 5 to 11                      |                   |
| <b>True negatives</b> (patients without CRC)                               | 2 studies<br>21435 patients    | cross-sectional (cohort type)                | serious <sup>a</sup>                            | serious <sup>b</sup> | not serious   | not serious | none             | 811 to 841                       | 783 to 812                   | ⊕⊕○○<br>Low       |

| Outcome                                                                | No of studies (No of patients) | Study design    | Factors that may decrease certainty of evidence |              |               |             |                  | Effect per 1,000 patients tested |                              | Test accuracy CoE |
|------------------------------------------------------------------------|--------------------------------|-----------------|-------------------------------------------------|--------------|---------------|-------------|------------------|----------------------------------|------------------------------|-------------------|
|                                                                        |                                |                 | Risk of bias                                    | Indirectness | Inconsistency | Imprecision | Publication bias | pre-test probability of 1.1%     | pre-test probability of 4.5% |                   |
| <b>False positives</b> (patients incorrectly classified as having CRC) |                                | accuracy study) |                                                 |              |               |             |                  | 148 to 178                       | 143 to 172                   |                   |

*Explanations*

- a. High risk of bias in patient selection and index test in Khan 2020.
- b. Results based on indirect comparisons from different studies

**References**

[1] Pin-Vieito N, Garcia Nimo L, Bujanda L, Roman Alonso B, Gutierrez-Stampa MA, Aguilar-Gama V, et al. Optimal diagnostic accuracy of quantitative faecal immunochemical test positivity thresholds for colorectal cancer detection in primary health care: A community-based cohort study. *United European Gastroenterology Journal* 2021;9(2):256-267.

[2] Khan AA, Klimovskij M, Harshen R. Accuracy of faecal immunochemical testing in patients with symptomatic colorectal cancer. *BJS Open* 2020;4(6):1180-1188.

**Question:** Should FIT be used to diagnose CRC in males in secondary care (threshold:  $\geq 10 \mu\text{g Hb/g}$ )?

| Sensitivity                                                                |                                | 0.91 to 0.95                                 |                                                 | Prevalences 2.3% 5.9% |               |             |                  |                                  |                   |
|----------------------------------------------------------------------------|--------------------------------|----------------------------------------------|-------------------------------------------------|-----------------------|---------------|-------------|------------------|----------------------------------|-------------------|
| Specificity                                                                |                                | 0.79 to 0.80                                 |                                                 |                       |               |             |                  |                                  |                   |
| Outcome                                                                    | No of studies (No of patients) | Study design                                 | Factors that may decrease certainty of evidence |                       |               |             |                  | Effect per 1,000 patients tested | Test accuracy CoE |
|                                                                            |                                |                                              | Risk of bias                                    | Indirectness          | Inconsistency | Imprecision | Publication bias | pre-test probability of 2.3%     |                   |
| <b>True positives</b> (patients with CRC)                                  | 2 studies<br>18168 patients    | cross-sectional (cohort type accuracy study) | serious <sup>a</sup>                            | serious <sup>b</sup>  | not serious   | not serious | none             | 21 to 22                         | ⊕⊕○○<br>Low       |
| <b>False negatives</b> (patients incorrectly classified as not having CRC) |                                |                                              |                                                 |                       |               |             |                  | 1 to 2                           |                   |
| <b>True negatives</b> (patients without CRC)                               | 2 studies<br>18168 patients    | cross-sectional (cohort type accuracy study) | serious <sup>a</sup>                            | serious <sup>b</sup>  | not serious   | not serious | none             | 772 to 782                       |                   |
| <b>False positives</b> (patients incorrectly classified as having CRC)     |                                |                                              |                                                 |                       |               |             |                  | 195 to 205                       |                   |

*Explanations*

a. High risk of bias in patient selection and index test in Khan 2020.

b. Results based on indirect comparisons from different studies.

### References

[1] Pin-Vieito N, Garcia Nimo L, Bujanda L, Roman Alonso B, Gutierrez-Stampa MA, Aguilar-Gama V, et al. Optimal diagnostic accuracy of quantitative faecal immunochemical test positivity thresholds for colorectal cancer detection in primary health care: A community-based cohort study. *United European Gastroenterology Journal* 2021;9(2):256-267.

[2] Khan AA, Klimovskij M, Harshen R. Accuracy of faecal immunochemical testing in patients with symptomatic colorectal cancer. *BJS Open* 2020;4(6):1180-1188.

**Question:** Should FIT be used to diagnose CRS in aspirin non-users?

|             |                             |
|-------------|-----------------------------|
| Sensitivity | 0.92 (95% CI: 0.88 to 0.95) |
| Specificity | 0.71 (95% CI: 0.69 to 0.73) |

|            |       |
|------------|-------|
| Prevalence | 11.6% |
|------------|-------|

| Outcome                                                                    | No of studies (No of patients) | Study design                                 | Factors that may decrease certainty of evidence |              |               |             |                                                  | Effect per 1,000 patients tested | Test accuracy CoE |
|----------------------------------------------------------------------------|--------------------------------|----------------------------------------------|-------------------------------------------------|--------------|---------------|-------------|--------------------------------------------------|----------------------------------|-------------------|
|                                                                            |                                |                                              | Risk of bias                                    | Indirectness | Inconsistency | Imprecision | Publication bias                                 | pre-test probability of 11.6%    |                   |
| <b>True positives</b> (patients with CRS)                                  | 1 study<br>2567 patients       | cross-sectional (cohort type accuracy study) | serious <sup>a</sup>                            | not serious  | not serious   | not serious | publication bias strongly suspected <sup>b</sup> | 107 (102 to 110)                 | ⊕⊕○○<br>Low       |
| <b>False negatives</b> (patients incorrectly classified as not having CRS) |                                |                                              |                                                 |              |               |             |                                                  | 9 (6 to 14)                      |                   |
| <b>True negatives</b> (patients without CRS)                               | 1 study<br>2567 patients       | cross-sectional (cohort type accuracy study) | serious <sup>a</sup>                            | not serious  | not serious   | not serious | publication bias strongly suspected <sup>b</sup> | 628 (610 to 645)                 |                   |
| <b>False positives</b> (patients incorrectly classified as having CRS)     |                                |                                              |                                                 |              |               |             |                                                  | 256 (239 to 274)                 |                   |

*Explanations*

a. Poor representativeness of the population.

b. Results based on a single study.



**References:**

- [1] Bujanda L, Sarasqueta C, Vega P, Salve M, Quintero E, Alvarez-Sanchez V, et al. Effect of aspirin on the diagnostic accuracy of the faecal immunochemical test for colorectal advanced neoplasia. *United European Gastroenterol J* 2018;6(1):123-130.

## **GRADE Tables**
